# Supplementary material
Source: publisher site journal article supplement (https://www.dovepress.com/article/supplementary_file/581757/581757_Supplementary%20Table%201.xlsx)
Supplement: Supplementary file 1 [file 581757_Supplementary%20Table%201.xlsx]

## Sheet: Supplementary Table 1
Table 3. Significant TWAS associations for non-BMI-associated LBP
ID	CHR	P0	P1	HSQ	BEST.GWAS.ID	BEST.GWAS.Z	EQTL.ID	EQTL.R2	EQTL.Z	EQTL.GWAS.Z	NSNP	NWGT	MODEL	MODELCV.R2	MODELCV.PV	TWAS.Z	TWAS.P	FDR	geneSymbol	Tissue
ENSG00000204682.5	10	21497261	21497262	0.033	rs6482189	4.25	rs1243188	-0.00173	3.16	3.54171	280	3	lasso	0.0035	0.081	3.99163	6.56e-05	0.0450806	CASC10	Adipose_Subcutaneous
ENSG00000183032.11	14	36875003	36875004	0.065	rs1950526	-5.11	rs12883863	0.022	4.85	-4.80908	526	1	top1	0.022	0.0002	-4.80908	1.52e-06	0.00699942	SLC25A21	Adipose_Subcutaneous
ENSG00000258708.1	14	37171887	37171888	0.0276	rs1950526	-5.11	rs7153180	0.0329	-4.63	-4.12945	461	1	top1	0.033	6.4e-06	4.12945	3.64e-05	0.0340165	SLC25A21-AS1	Adipose_Subcutaneous
ENSG00000151338.18	14	37197912	37197913	0.1018	rs1950526	-5.11	rs7151191	0.0812	7.5	-4.83532	442	442	susie	0.13	2.8e-19	-4.08934	4.33e-05	0.0377638	MIPOL1	Adipose_Subcutaneous
ENSG00000262686.1	16	4328339	4328340	0.0514	rs715109	-3.84	rs2278566	-0.00145	3.77	2.94977	387	11	enet	0.00064	0.24	4.10764	4e-05	0.0364168	GLIS2-AS1	Adipose_Subcutaneous
ENSG00000183336.8	16	29454963	29454964	0.0681	rs35042042	4.38	rs11646118	0.0145	-4.01	3.27088	161	161	susie	0.016	0.0011	-4.15484	3.26e-05	0.0322686	BOLA2	Adipose_Subcutaneous
ENSG00000090857.13	16	70113625	70113626	0.0528	rs7192865	4.19	rs12447090	0.0218	-4.89	3.96055	186	5	lasso	0.028	2.9e-05	-3.95718	7.58e-05	0.0473172	PDPR	Adipose_Subcutaneous
ENSG00000169599.12	2	69437627	69437628	0.0742	rs13429805	4.97	rs7422275	0.0447	5.23	4.19527	371	1	top1	0.045	1.6e-07	4.19527	2.73e-05	0.0295421	NFU1	Adipose_Subcutaneous
ENSG00000186448.14	3	44584887	44584888	0.1286	rs7616538	4.32	rs13319803	0.0841	9.17	-3.57512	319	37	enet	0.15	1.2e-22	-4.13973	3.48e-05	0.0332049	ZNF197	Adipose_Subcutaneous
ENSG00000225399.4	3	49260084	49260085	0.1366	rs10865954	4.42	rs4955418	0.0438	-5.6	3.72322	271	20	enet	0.045	1.6e-07	-4.91212	9.01e-07	0.0063618	RP11-3B7.1	Adipose_Subcutaneous
ENSG00000164068.15	3	49689501	49689502	0.1951	rs2029591	4.29	rs11716575	0.202	11.05	3.16088	316	316	susie	0.25	1.1e-37	3.98229	6.83e-05	0.0456467	RNF123	Adipose_Subcutaneous
ENSG00000174564.12	3	136957864	136957865	0.3713	rs13099657	3.75	rs1048145	0.127	-8.86	-3.32917	332	79	enet	0.18	1.1e-26	4.30436	1.67e-05	0.0240796	IL20RB	Adipose_Subcutaneous
ENSG00000178222.12	4	1113561	1113562	0.1989	rs2242278	4.8	rs1670534	0.0701	6.81	1.64917	385	69	enet	0.098	6.2e-15	4.71276	2.44e-06	0.00886133	RNF212	Adipose_Subcutaneous
ENSG00000273179.1	4	1167777	1167778	0.0849	rs2242278	4.8	rs11247975	0.0604	6.58	-4.32137	383	1	top1	0.06	1.2e-09	-4.32137	1.55e-05	0.0232709	RP11-20I20.4	Adipose_Subcutaneous
ENSG00000243056.1	5	140547665	140547666	0.0507	rs4279384	4.1	rs778583	0.024022	4.91	3.44788	328	328	susie	0.026	5.9e-05	3.99635	6.43e-05	0.0446081	EIF4EBP3	Adipose_Subcutaneous
ENSG00000087206.16	5	177022601	177022602	0.053	rs353489	4.16	rs1700490	0.044675	5.33	4.05942	385	1	top1	0.045	1.6e-07	4.05942	4.92e-05	0.0389842	UIMC1	Adipose_Subcutaneous
ENSG00000185585.19	9	124777157	124777158	0.0599	rs16927537	4.89	rs10760376	0.0709	-6.58	3.97259	303	1	top1	0.071	4.1e-11	-3.97259	7.11e-05	0.0456467	OLFML2A	Adipose_Subcutaneous
ENSG00000150051.13	10	27746059	27746060	0.0674	rs903282	4.32	rs2815542	0.025636	-4.11	3.96922	471	1	top1	0.026	0.00029	-3.96922	7.21e-05	0.0459095	MKX	Adipose_Visceral_Omentum
ENSG00000107742.12	10	72089031	72089032	0.2565	rs4148946	-5.64	rs1245543	0.12363	8	3.75371	476	9	lasso	0.13	2.6e-16	3.93886	8.19e-05	0.0493789	SPOCK2	Adipose_Visceral_Omentum
ENSG00000166086.12	11	134068924	134068925	0.2362	rs597320	-3.67	rs11223699	0.0343	-5.54	-1.97686	544	544	susie	0.12	6.2e-15	4.15808	3.21e-05	0.031873	JAM3	Adipose_Visceral_Omentum
ENSG00000196917.5	12	122730842	122730843	0.1534	rs10773921	-3.64	rs10847574	0.026636	-4.57	-2.20842	298	29	enet	0.031	6.7e-05	4.01787	5.87e-05	0.042389	HCAR1	Adipose_Visceral_Omentum
ENSG00000183032.11	14	36875003	36875004	0.0515	rs1950526	-5.11	rs7143938	0.0494	4.96	-4.27734	528	1	top1	0.049	7e-07	-4.27734	1.89e-05	0.0246408	SLC25A21	Adipose_Visceral_Omentum
ENSG00000258708.1	14	37171887	37171888	0.0928	rs1950526	-5.11	rs11156934	0.0349	-6.44	-4.0994	464	464	susie	0.057	1e-07	4.28154	1.86e-05	0.0246408	SLC25A21-AS1	Adipose_Visceral_Omentum
ENSG00000151338.18	14	37197912	37197913	0.0921	rs1950526	-5.11	rs11627844	0.0487	5.41	-4.35659	445	1	top1	0.049	8.3e-07	-4.35659	1.32e-05	0.0222416	MIPOL1	Adipose_Visceral_Omentum
ENSG00000103502.13	16	29863735	29863736	0.1142	rs35042042	4.08	rs35042042	0.044	-5.82	4.07509	156	7	enet	0.049	8.3e-07	-4.0818	4.47e-05	0.0383861	CDIPT	Adipose_Visceral_Omentum
ENSG00000124302.12	19	33621954	33621955	0.1884	rs8112967	-4.58	rs10404460	0.0649	6.54	2.40791	473	473	susie	0.15	3.6e-18	4.41612	1e-05	0.018989	CHST8	Adipose_Visceral_Omentum
ENSG00000204859.12	1	6580000	6580001	0.0698	rs6577393	3.905	rs737243	-0.00201	-3.24	-1.17401	433	433	susie	0.016	0.0035	5.09289	3.53e-07	0.00477701	ZBTB48	Adipose_Visceral_Omentum
ENSG00000101017.13	20	46118271	46118272	0.2207	rs12624433	3.84	rs4810485	0.118593	-8.12	3.755	499	22	enet	0.14	2e-17	-4.10015	4.13e-05	0.0368468	CD40	Adipose_Visceral_Omentum
ENSG00000169599.12	2	69437627	69437628	0.1141	rs13429805	4.98	rs7578692	0.0461	5.88	4.82403	387	387	susie	0.052	3.2e-07	5.00595	5.56e-07	0.00481494	NFU1	Adipose_Visceral_Omentum
ENSG00000196345.12	3	44555192	44555193	0.0647	rs3804580	4.29	rs1506659	0.00802	-4.3	3.6964	311	311	susie	0.011	0.013	-4.01253	6.01e-05	0.0429123	ZKSCAN7	Adipose_Visceral_Omentum
ENSG00000214820.3	3	44581025	44581026	0.0375	rs7616538	4.3	rs2279908	0.006442	-4.17	3.82005	316	316	susie	0.013	0.0074	-4.05511	5.01e-05	0.0391121	MPRIPP1	Adipose_Visceral_Omentum
ENSG00000163807.5	3	44761661	44761662	0.2388	rs3804580	4.29	rs11922470	0.248513	11.1	3.8406	386	23	enet	0.26	5e-32	4.20591	2.6e-05	0.0290886	KIAA1143	Adipose_Visceral_Omentum
ENSG00000164068.15	3	49689501	49689502	0.1964	rs2029591	4.29	rs11130218	0.140424	8.57	3.19569	318	318	susie	0.17	2.5e-21	4.00166	6.29e-05	0.0440913	RNF123	Adipose_Visceral_Omentum
ENSG00000178222.12	4	1113561	1113562	0.1742	rs2242278	4.8	rs2242278	0.049188	6.24	4.79582	380	30	enet	0.092	1e-11	5.35266	8.67e-08	0.00229565	RNF212	Adipose_Visceral_Omentum
ENSG00000273179.1	4	1167777	1167778	0.1248	rs2242278	4.8	rs11247975	0.084323	6.6	-4.32137	378	14	enet	0.087	4.5e-11	-4.8105	1.51e-06	0.00699942	RP11-20I20.4	Adipose_Visceral_Omentum
ENSG00000213523.10	5	140558251	140558252	0.1098	rs4279384	4.1	rs250424	0.04	-4.99	4.06967	328	1	top1	0.04	7.6e-06	-4.06967	4.71e-05	0.0388982	SRA1	Adipose_Visceral_Omentum
ENSG00000283602.1	5	140594569	140594570	0.1376	rs4279384	4.1	rs250429	0.108	7.57	4.06273	328	1	top1	0.11	1.5e-13	4.06273	4.85e-05	0.0389842	AC011380.8	Adipose_Visceral_Omentum
ENSG00000197816.13	9	97307360	97307361	0.1985	rs16918311	4.17	rs10817300	0.00311	-4.59	-2.4545	321	58	enet	0.042	4.9e-06	4.32866	1.5e-05	0.0232709	CCDC180	Adipose_Visceral_Omentum
ENSG00000107742.12	10	72089031	72089032	0.5269	rs4148946	-5.64	rs1678627	0.481235	-10.72	4.1648	487	487	susie	0.51	8.6e-38	-4.84928	1.24e-06	0.00656309	SPOCK2	Adrenal_Gland
ENSG00000258708.1	14	37171887	37171888	0.1237	rs1950526	-5.11	rs12886692	0.041	-5.21	-4.40534	473	473	susie	0.074	1.4e-05	4.73095	2.23e-06	0.00867964	SLC25A21-AS1	Adrenal_Gland
ENSG00000169599.12	2	69437627	69437628	0.176	rs13429805	4.98	rs10185891	0.117	6.71	4.86122	390	34	enet	0.19	1.8e-12	4.46801	7.9e-06	0.0174314	NFU1	Adrenal_Gland
ENSG00000185414.19	2	99181078	99181079	0.1385	rs1563108	4.25	rs1563108	0.0399	-4.3	4.25461	302	1	lasso	0.054	0.00019	-4.25461	2.09e-05	0.0256634	MRPL30	Adrenal_Gland
ENSG00000173540.12	3	49723950	49723951	0.1187	rs2029591	4.29	rs4241405	0.027252	4.38	4.28768	318	23	enet	0.047	0.00049	4.3051	1.67e-05	0.0240796	GMPPB	Adrenal_Gland
ENSG00000178222.12	4	1113561	1113562	0.1157	rs2242278	4.8	rs651017	0.0375	4.43	1.61795	384	14	enet	0.052	0.00025	4.40462	1.06e-05	0.0194683	RNF212	Adrenal_Gland
ENSG00000213523.10	5	140558251	140558252	0.1195	rs4279384	4.1	rs3733681	0.0878	-4.87	4.0519	330	1	top1	0.088	2.5e-06	-4.0519	5.08e-05	0.0393684	SRA1	Adrenal_Gland
ENSG00000005020.12	7	26995238	26995239	0.123	rs7799519	-4.83	rs1024453	0.059676	4.58	-4.4215	501	1	top1	0.06	9.8e-05	-4.4215	9.8e-06	0.0189111	SKAP2	Adrenal_Gland
ENSG00000128573.24	7	114086326	114086327	0.0779	rs12705960	5.21	rs1476535	0.043859	-3.76	-4.435	257	1	top1	0.044	0.00076	4.435	9.21e-06	0.0189111	FOXP2	Adrenal_Gland
ENSG00000072657.8	12	72087265	72087266	0.0913	rs845284	3.76	rs4584622	0.0153	4.2	-2.69121	385	12	enet	0.034	0.00015	-4.17306	3.01e-05	0.0309511	TRHDE	Artery_Aorta
ENSG00000139354.10	12	100573682	100573683	0.0832	rs1045602	-3.97	rs35707	0.047	5.18	-3.94735	447	1	top1	0.047	1e-05	-3.94735	7.9e-05	0.0481789	GAS2L3	Artery_Aorta
ENSG00000244754.8	13	32538884	32538885	0.1082	rs499966	4.6	rs7328733	0.066318	5.67	4.2955	476	1	top1	0.066	1.7e-07	4.29549	1.74e-05	0.0241697	N4BP2L2	Artery_Aorta
ENSG00000258708.1	14	37171887	37171888	0.06	rs1950526	-5.11	rs12883863	0.022349	-4.43	-4.8091	471	471	susie	0.024	0.0012	4.70037	2.6e-06	0.0090782	SLC25A21-AS1	Artery_Aorta
ENSG00000167371.17	16	29811985	29811986	0.0429	rs35042042	4.1	rs3815822	-0.00202	3.23	-2.60313	156	156	susie	0.0096	0.03	-3.98896	6.64e-05	0.0450806	PRRT2	Artery_Aorta
ENSG00000103502.13	16	29863735	29863736	0.1108	rs35042042	4.11	rs35042042	0.028	-4.58	4.10789	157	157	susie	0.036	9.3e-05	-4.05825	4.94e-05	0.0389914	CDIPT	Artery_Aorta
ENSG00000152683.14	2	32165840	32165841	0.08	rs212730	4	rs430759	0.0349	5.03	3.90428	269	11	enet	0.044	1.8e-05	4.19725	2.7e-05	0.0295421	SLC30A6	Artery_Aorta
ENSG00000178222.12	4	1113561	1113562	0.2764	rs2242278	4.8	rs6826705	0.051368	-5.23	-4.2222	385	26	enet	0.11	7.2e-12	4.19504	2.73e-05	0.0295421	RNF212	Artery_Aorta
ENSG00000273179.1	4	1167777	1167778	0.0891	rs2242278	4.8	rs17164380	0.013833	-4	4.70702	383	383	susie	0.016	0.0075	-4.90552	9.32e-07	0.00642234	RP11-20I20.4	Artery_Aorta
ENSG00000283602.1	5	140594569	140594570	0.0757	rs4279384	4.1	rs1432959	0.041832	4.45	3.98097	330	1	top1	0.042	3e-05	3.98097	6.86e-05	0.0456467	AC011380.8	Artery_Aorta
ENSG00000135318.11	6	85449583	85449584	0.0788	rs9362215	4.42	rs9362215	0.041487	4.73	4.42139	432	1	top1	0.041	3.2e-05	4.42139	9.81e-06	0.0189111	NT5E	Artery_Aorta
ENSG00000130305.16	7	73308866	73308867	0.0902	rs6951030	3.25	rs6951030	0.00782	3.53	3.25293	147	15	enet	0.039	6e-05	5.09805	3.43e-07	0.00477701	NSUN5	Artery_Aorta
ENSG00000004059.10	7	127588344	127588345	0.0636	rs3808087	5.31	rs717944	0.0132	3.76	4.58439	470	1	top1	0.013	0.013	4.58439	4.55e-06	0.0122517	ARF5	Artery_Aorta
ENSG00000280303.2	8	140636280	140636281	0.0654	rs2944776	-5.6	rs6987810	0.00854	3.86	-3.64782	369	15	enet	0.024	0.0013	-4.33292	1.47e-05	0.0232709	ERICD	Artery_Aorta
ENSG00000197816.13	9	97307360	97307361	0.3136	rs16918311	4.16	rs2795366	0.0191	-4.65	-2.47883	327	35	enet	0.086	2.2e-09	4.05744	4.96e-05	0.0389914	CCDC180	Artery_Aorta
ENSG00000255642.1	12	63822156	63822157	0.0955	rs12229174	4.34	rs35143986	-0.00373	3.85	2.7594	293	5	lasso	0.0054	0.14	4.29397	1.76e-05	0.0241697	PABPC1P4	Artery_Coronary
ENSG00000260306.1	16	21795758	21795759	0.4114	rs161330	-5.86	rs4783412	0.185	-6.49	-2.569	136	136	susie	0.24	1.6e-14	4.14815	3.35e-05	0.032551	RP11-645C24.5	Artery_Coronary
ENSG00000141458.12	18	23586897	23586898	0.369	rs2337024	-4.18	rs1805081	0.19993	6.69	-3.6255	359	11	lasso	0.23	6.1e-14	-4.27392	1.92e-05	0.024799	NPC1	Artery_Coronary
ENSG00000169599.12	2	69437627	69437628	0.2147	rs13429805	4.98	rs7583591	0.002158	-3.82	-3.27612	397	397	susie	0.019	0.023	4.69483	2.67e-06	0.00912213	NFU1	Artery_Coronary
ENSG00000135951.14	2	99154953	99154954	0.0964	rs1563108	4.25	rs1563108	0.06732	-4.62	4.25461	298	1	top1	0.067	7.6e-05	-4.25461	2.09e-05	0.0256634	TSGA10	Artery_Coronary
ENSG00000185414.19	2	99181078	99181079	0.0799	rs1563108	4.25	rs1563108	0.025222	-3.74	4.25461	303	1	top1	0.025	0.012	-4.25461	2.09e-05	0.0256634	MRPL30	Artery_Coronary
ENSG00000225399.4	3	49260084	49260085	0.1497	rs10865954	4.42	rs12490393	0.127246	-5.72	3.68057	270	11	enet	0.14	1.2e-08	-4.12306	3.74e-05	0.0348486	RP11-3B7.1	Artery_Coronary
ENSG00000188315.7	3	49277829	49277830	0.131	rs10865954	4.42	rs10865954	0.040462	-3.95	4.41975	276	1	top1	0.04	0.0019	-4.41975	9.88e-06	0.0189111	C3orf62	Artery_Coronary
ENSG00000174564.12	3	136957864	136957865	0.2055	rs13099657	3.75	rs6777391	0.022414	-3.75	-3.6529	333	15	enet	0.085	8.8e-06	3.95816	7.55e-05	0.0472853	IL20RB	Artery_Coronary
ENSG00000178222.12	4	1113561	1113562	0.2662	rs2242278	4.8	rs11937228	0.039944	-4.51	-1.8144	385	385	susie	0.061	0.00016	4.2183	2.46e-05	0.0280155	RNF212	Artery_Coronary
ENSG00000128573.24	7	114086326	114086327	0.1855	rs12705960	5.21	rs2140615	0.014734	-4.21	5.08949	257	257	susie	0.027	0.0094	-4.89114	1e-06	0.00648183	FOXP2	Artery_Coronary
ENSG00000107742.12	10	72089031	72089032	0.0382	rs4148946	-5.64	rs3312	0.0241	4.73	4.22072	473	1	top1	0.024	9.7e-05	4.22072	2.44e-05	0.0280155	SPOCK2	Artery_Tibial
ENSG00000281026.1	13	32509394	32509395	0.0226	rs499966	4.63	rs2301389	0.00555	-4.24	3.45704	449	449	susie	0.023	0.00016	-3.9543	7.68e-05	0.0476606	N4BP2L2-IT2	Artery_Tibial
ENSG00000244754.8	13	32538884	32538885	0.0857	rs499966	4.6	rs7328733	0.0541	5.74	4.29549	461	1	top1	0.054	7.7e-09	4.2955	1.74e-05	0.0241697	N4BP2L2	Artery_Tibial
ENSG00000258708.1	14	37171887	37171888	0.0544	rs1950526	-5.11	rs1955939	0.029	-5.48	-4.3956	458	458	susie	0.039	8.4e-07	4.4507	8.56e-06	0.0183772	SLC25A21-AS1	Artery_Tibial
ENSG00000151338.18	14	37197912	37197913	0.0645	rs1950526	-5.11	rs1955934	0.0646	6.61	-4.9754	439	439	susie	0.067	1.4e-10	-5.0142	5.33e-07	0.00481494	MIPOL1	Artery_Tibial
ENSG00000260306.1	16	21795758	21795759	0.4474	rs161330	-5.65	rs8060224	0.060195	-8.08	-0.35269	130	130	susie	0.28	3.1e-44	4.14917	3.34e-05	0.032551	RP11-645C24.5	Artery_Tibial
ENSG00000185909.14	3	49171610	49171611	0.054	rs10865954	4.42	rs10865954	0.0487	5.56	4.41975	262	1	top1	0.049	4.3e-08	4.41975	9.88e-06	0.0189111	KLHDC8B	Artery_Tibial
ENSG00000173421.16	3	49198427	49198428	0.4125	rs10865954	4.42	rs11130184	0.263	-12.64	3.74584	259	31	enet	0.3	1.6e-46	-4.05701	4.97e-05	0.0389914	CCDC36	Artery_Tibial
ENSG00000225399.4	3	49260084	49260085	0.2994	rs10865954	4.42	rs12631989	0.147	-9.59	3.69628	271	22	enet	0.16	4.6e-24	-4.19097	2.78e-05	0.0295421	RP11-3B7.1	Artery_Tibial
ENSG00000168917.8	3	136818646	136818647	0.0729	rs13099657	3.87	rs6777391	0.00493	-3.85	-3.6529	340	15	enet	0.016	0.0014	4.56421	5.01e-06	0.0131559	SLC35G2	Artery_Tibial
ENSG00000174564.12	3	136957864	136957865	0.2948	rs13099657	3.75	rs1048145	0.114	-8.46	-3.32917	333	59	enet	0.13	5.6e-19	4.43764	9.09e-06	0.0188981	IL20RB	Artery_Tibial
ENSG00000178222.12	4	1113561	1113562	0.1144	rs2242278	4.8	rs2127908	0.005184	-4.54	-4.29049	385	385	susie	0.028	2.5e-05	4.73314	2.21e-06	0.00867964	RNF212	Artery_Tibial
ENSG00000188981.10	4	3244368	3244369	0.0508	rs363066	-4.08	rs362306	0.00902	-4.79	-3.95291	415	1	top1	0.009	0.012	3.95291	7.72e-05	0.0476914	MSANTD1	Artery_Tibial
ENSG00000029559.6	4	87799580	87799581	0.0502	rs2126650	4.32	rs2126650	0.001903	3.74	4.32433	494	494	susie	0.01	0.0089	3.96546	7.33e-05	0.0463024	IBSP	Artery_Tibial
ENSG00000213523.10	5	140558251	140558252	0.1301	rs4279384	4.1	rs1862176	0.0998	-7.94	3.97144	328	1	top1	0.1	3.2e-15	-3.97144	7.14e-05	0.0456467	SRA1	Artery_Tibial
ENSG00000234155.1	6	85390185	85390186	0.0417	rs9362215	4.42	rs7753022	0.0157	3.92	4.19929	443	1	top1	0.016	0.0014	4.19929	2.68e-05	0.0295421	RP11-30P6.6	Artery_Tibial
ENSG00000081760.16	12	125065378	125065379	0.344	rs325084	3.19	rs11058046	0.021601	3.57	2.17185	545	545	susie	0.049	0.0065	4.07149	4.67e-05	0.0388982	AACS	Brain_Amygdala
ENSG00000178467.17	3	48989988	48989989	0.1349	rs10865954	4.42	rs12493578	0.0364	-3.65	2.66343	260	11	enet	0.075	0.00096	-4.00394	6.23e-05	0.0439889	P4HTM	Brain_Amygdala
ENSG00000177352.9	3	49166320	49166321	0.0957	rs10865954	4.42	rs7617480	0.0724	4.19	4.36312	259	1	top1	0.072	0.0012	4.36312	1.28e-05	0.0222242	CCDC71	Brain_Amygdala
ENSG00000234155.1	6	85390185	85390186	0.188	rs9362215	4.42	rs4373339	0.04034	4.57	4.11647	444	444	susie	0.09	0.00031	4.37347	1.22e-05	0.0215355	RP11-30P6.6	Brain_Amygdala
ENSG00000260306.1	16	21795758	21795759	0.5051	rs161330	-5.86	rs12920623	0.0266	-5.33	-0.1952	136	136	susie	0.37	1.7e-16	4.3205	1.56e-05	0.0232709	RP11-645C24.5	Brain_Anterior_cingulate_cortex_BA24
ENSG00000225399.4	3	49260084	49260085	0.1439	rs10865954	4.42	rs4955420	0.088397	-4.35	4.41444	271	1	top1	0.088	0.00015	-4.41444	1.01e-05	0.018989	RP11-3B7.1	Brain_Anterior_cingulate_cortex_BA24
ENSG00000178222.12	4	1113561	1113562	0.265	rs2242278	4.8	rs4974629	0.02782	-4.43	-4.40476	384	12	lasso	0.065	0.0011	4.62951	3.67e-06	0.0106009	RNF212	Brain_Anterior_cingulate_cortex_BA24
ENSG00000163945.15	4	1347265	1347266	0.377	rs2242278	4.8	rs4974613	0.11251	4.57	4.34244	376	1	top1	0.11	1.9e-05	4.34244	1.41e-05	0.0229748	UVSSA	Brain_Anterior_cingulate_cortex_BA24
ENSG00000029559.6	4	87799580	87799581	0.357	rs2126650	4.32	rs1054627	0.16044	6.09	4.24102	503	7	lasso	0.25	6.9e-11	4.75534	1.98e-06	0.00838826	IBSP	Brain_Anterior_cingulate_cortex_BA24
ENSG00000234155.1	6	85390185	85390186	0.2253	rs9362215	4.42	rs6942065	0.02564	4.54	4.10095	445	6	lasso	0.083	0.00023	5.32797	9.93e-08	0.00242702	RP11-30P6.6	Brain_Anterior_cingulate_cortex_BA24
ENSG00000135318.11	6	85449583	85449584	0.2393	rs9362215	4.42	rs4487548	0.11537	4.69	4.27643	432	432	susie	0.12	9.1e-06	4.29712	1.73e-05	0.0241697	NT5E	Brain_Anterior_cingulate_cortex_BA24
ENSG00000122863.5	10	71964364	71964365	0.1549	rs4148946	-5.64	rs7085958	0.102699	4.81	-5.51133	551	2	lasso	0.1	2.4e-06	-5.513	3.53e-08	0.00192407	CHST3	Brain_Caudate_basal_ganglia
ENSG00000260306.1	16	21795758	21795759	0.447	rs161330	-5.86	rs4783412	0.153	-5.99	-2.56903	137	137	susie	0.3	4.2e-17	4.11712	3.84e-05	0.0355607	RP11-645C24.5	Brain_Caudate_basal_ganglia
ENSG00000213523.10	5	140558251	140558252	0.356	rs4279384	4.1	rs6871703	0.143	-6.05	3.9991	328	328	susie	0.17	1.4e-09	-4.03	5.5e-05	0.0415096	SRA1	Brain_Caudate_basal_ganglia
ENSG00000283602.1	5	140594569	140594570	0.2859	rs4279384	4.1	rs6871703	0.191	6.94	4.0037	328	328	susie	0.21	6.7e-12	3.94	8.06e-05	0.0487802	AC011380.8	Brain_Caudate_basal_ganglia
ENSG00000087206.16	5	177022601	177022602	0.279	rs353489	4.15	rs353493	0.0355	3.77	4.1107	396	396	susie	0.036	0.0045	3.93	8.39e-05	0.0498283	UIMC1	Brain_Caudate_basal_ganglia
ENSG00000234155.1	6	85390185	85390186	0.2508	rs9362215	4.42	rs9359655	0.075612	4.66	4.23654	445	445	susie	0.091	1.1e-05	4.29321	1.76e-05	0.0241697	RP11-30P6.6	Brain_Caudate_basal_ganglia
ENSG00000135318.11	6	85449583	85449584	0.2951	rs9362215	4.42	rs6942065	0.034817	5.32	4.10095	432	22	enet	0.12	2.9e-07	4.3089	1.64e-05	0.0239032	NT5E	Brain_Caudate_basal_ganglia
ENSG00000107742.12	10	72089031	72089032	0.6636	rs4148946	-5.64	rs7072673	0.304295	-7.58	4.08655	486	486	susie	0.31	7.2e-16	-4.18313	2.88e-05	0.0301014	SPOCK2	Brain_Cerebellar_Hemisphere
ENSG00000280061.1	19	30553955	30553956	0.2181	rs1549939	4.41	rs7253628	0.138	-5.87	3.86758	414	414	susie	0.16	2.7e-08	-3.984	6.78e-05	0.0455445	CTD-2001J20.1	Brain_Cerebellar_Hemisphere
ENSG00000233276.3	3	49358599	49358600	0.1836	rs10865954	4.42	rs9853683	0.068916	-4.92	-3.04454	277	277	susie	0.19	1e-09	4.59297	4.37e-06	0.0119699	GPX1	Brain_Cerebellar_Hemisphere
ENSG00000170458.13	5	140633700	140633701	0.169	rs4279384	4.1	rs1835148	0.03399	3.5	4.06773	344	1	top1	0.034	0.0083	4.06773	4.75e-05	0.0388982	CD14	Brain_Cerebellar_Hemisphere
ENSG00000004864.13	7	96322146	96322147	0.3093	rs7811725	4.92	rs10953169	0.221016	6.9	4.60342	428	1	top1	0.22	3.1e-11	4.60342	4.16e-06	0.0114938	SLC25A13	Brain_Cerebellar_Hemisphere
ENSG00000122863.5	10	71964364	71964365	0.1173	rs4148946	-5.64	rs4148933	0.026493	4.27	-5.5162	552	552	susie	0.061	0.00018	-5.5938	2.22e-08	0.00192407	CHST3	Brain_Cerebellum
ENSG00000107742.12	10	72089031	72089032	0.4413	rs4148946	-5.64	rs3312	0.251089	-7.58	4.2207	479	479	susie	0.26	1.2e-15	-4.4375	9.1e-06	0.0188981	SPOCK2	Brain_Cerebellum
ENSG00000102882.11	16	30123505	30123506	0.1381	rs35042042	4.5	rs4609871	0.065748	4.84	-3.5951	227	15	enet	0.082	1.6e-05	-4.14667	3.37e-05	0.0326455	MAPK3	Brain_Cerebellum
ENSG00000279602.1	17	43361360	43361361	0.2549	rs9912587	4.1	rs3950989	0.167	-7.16	3.39585	301	20	enet	0.26	2.2e-15	-4.185	2.85e-05	0.0299851	CTD-3014M21.1	Brain_Cerebellum
ENSG00000144214.9	2	99304741	99304742	0.2172	rs12479064	4.36	rs1955393	0.0401	5.44	2.93415	312	15	enet	0.14	1.4e-08	3.95272	7.73e-05	0.0476914	LYG1	Brain_Cerebellum
ENSG00000233276.3	3	49358599	49358600	0.1633	rs10865954	4.42	rs11710434	0.134573	5.77	3.90694	277	37	enet	0.15	2.3e-09	5.16678	2.38e-07	0.00432475	GPX1	Brain_Cerebellum
ENSG00000273179.1	4	1167777	1167778	0.303	rs2242278	4.8	rs11247975	0.149581	5.79	-4.32137	382	1	top1	0.15	4.4e-09	-4.32137	1.55e-05	0.0232709	RP11-20I20.4	Brain_Cerebellum
ENSG00000068078.17	4	1793306	1793307	0.1568	rs4974613	4.34	rs12502543	0.000785	3.77	4.06642	280	17	enet	0.031	0.0063	4.05589	4.99e-05	0.0390519	FGFR3	Brain_Cerebellum
ENSG00000251453.1	5	140581503	140581504	0.1466	rs4279384	4.1	rs6860077	0.142681	6.22	3.97313	329	329	susie	0.16	2e-09	3.99113	6.58e-05	0.0450806	HAUS1P1	Brain_Cerebellum
ENSG00000283602.1	5	140594569	140594570	0.3313	rs4279384	4.1	rs6860077	0.328265	8.61	3.97313	328	328	susie	0.33	3.3e-20	3.98888	6.64e-05	0.0450806	AC011380.8	Brain_Cerebellum
ENSG00000004864.13	7	96322146	96322147	0.2396	rs7811725	4.92	rs12704844	0.206915	7.31	3.86339	426	426	susie	0.22	4.3e-13	4.04	5.24e-05	0.0401191	SLC25A13	Brain_Cerebellum
ENSG00000279078.1	7	127998076	127998077	0.1698	rs3808087	5.31	rs3808084	0.005883	3.66	5.29465	402	402	susie	0.02	0.024	4.22	2.49e-05	0.0282559	SND1-IT1	Brain_Cerebellum
ENSG00000122863.5	10	71964364	71964365	0.1362	rs4148946	-5.64	rs2127357	0.012323	3.99	-5.45737	552	1	top1	0.012	0.061	-5.45737	4.83e-08	0.00192407	CHST3	Brain_Cortex
ENSG00000258708.1	14	37171887	37171888	0.1541	rs1950526	-5.11	rs7153180	-2.63e-05	-3.88	-4.12945	477	477	susie	0.011	0.073	4.27856	1.88e-05	0.0246408	SLC25A21-AS1	Brain_Cortex
ENSG00000183336.8	16	29454963	29454964	0.1553	rs35042042	4.43	rs4420550	-0.00475	3.94	-3.3661	164	10	enet	0.024	0.015	-4.63811	3.52e-06	0.0106009	BOLA2	Brain_Cortex
ENSG00000102882.11	16	30123505	30123506	0.3088	rs35042042	4.5	rs2005219	0.246	7.54	-3.076	226	11	enet	0.34	2.8e-20	-3.94979	7.82e-05	0.0480286	MAPK3	Brain_Cortex
ENSG00000141452.9	18	23503469	23503470	0.279	rs2337024	-4.09	rs6507716	0.12257	5.9	-3.826	347	347	susie	0.14	2.7e-08	-3.9779	6.95e-05	0.0456467	C18orf8	Brain_Cortex
ENSG00000198380.12	2	69387253	69387254	0.0863	rs6724567	4.97	rs6747389	0.002028	-3.44	-2.4356	404	404	susie	0.0054	0.15	4.66514	3.08e-06	0.00991339	GFPT1	Brain_Cortex
ENSG00000173540.12	3	49723950	49723951	0.2695	rs2029591	4.29	rs9824435	0.293995	8.29	3.77393	318	17	enet	0.3	5.9e-18	3.97235	7.12e-05	0.0456467	GMPPB	Brain_Cortex
ENSG00000283602.1	5	140594569	140594570	0.4008	rs4279384	4.1	rs4279384	0.355369	8.84	4.10147	327	327	susie	0.36	1.2e-21	4.09181	4.28e-05	0.0375667	AC011380.8	Brain_Cortex
ENSG00000234155.1	6	85390185	85390186	0.1632	rs9362215	4.42	rs9362215	0.077387	4.88	4.42139	444	8	enet	0.093	5e-06	4.52161	6.14e-06	0.0152414	RP11-30P6.6	Brain_Cortex
ENSG00000135318.11	6	85449583	85449584	0.2389	rs9362215	4.42	rs4373339	0.14011	5.51	4.11647	431	1	top1	0.14	1.9e-08	4.11647	3.85e-05	0.0355607	NT5E	Brain_Cortex
ENSG00000103485.17	16	29679007	29679008	0.5721	rs35042042	4.15	rs9933310	0.242	-6.7	-3.8733	182	5	lasso	0.26	4.1e-13	4.0179	5.87e-05	0.042389	QPRT	Brain_Frontal_Cortex_BA9
ENSG00000102882.11	16	30123505	30123506	0.3595	rs35042042	4.5	rs2005219	0.111	6.32	-3.076	227	15	enet	0.24	3e-12	-4.4258	9.61e-06	0.0189111	MAPK3	Brain_Frontal_Cortex_BA9
ENSG00000141458.12	18	23586897	23586898	0.28	rs2337024	-4.18	rs1652376	0.103814	5.4	-3.934	363	3	lasso	0.13	5.3e-07	-3.9369	8.25e-05	0.0495526	NPC1	Brain_Frontal_Cortex_BA9
ENSG00000233276.3	3	49358599	49358600	0.2466	rs10865954	4.42	rs6778080	0.197	6.08	3.32428	277	26	enet	0.22	5.7e-11	3.9578	7.56e-05	0.0472853	GPX1	Brain_Frontal_Cortex_BA9
ENSG00000173540.12	3	49723950	49723951	0.1979	rs2029591	4.29	rs6446285	0.222	6.53	4.17987	314	1	top1	0.22	2.9e-11	4.17987	2.92e-05	0.0302212	GMPPB	Brain_Frontal_Cortex_BA9
ENSG00000178222.12	4	1113561	1113562	0.2422	rs2242278	4.8	rs2127908	0.075672	-4.45	-4.29049	384	384	susie	0.08	8.4e-05	4.60554	4.11e-06	0.0114553	RNF212	Brain_Frontal_Cortex_BA9
ENSG00000029559.6	4	87799580	87799581	0.4721	rs2126650	4.32	rs1054627	0.207036	6.73	4.24102	500	42	enet	0.28	1.8e-14	4.07874	4.53e-05	0.0387588	IBSP	Brain_Frontal_Cortex_BA9
ENSG00000213523.10	5	140558251	140558252	0.2593	rs4279384	4.1	rs1862176	0.172384	-6.04	3.97144	328	1	top1	0.17	6.7e-09	-3.9714	7.14e-05	0.0456467	SRA1	Brain_Frontal_Cortex_BA9
ENSG00000283602.1	5	140594569	140594570	0.3709	rs4279384	4.1	rs4279384	0.352536	7.94	4.10147	328	1	top1	0.35	2.9e-18	4.1015	4.11e-05	0.0368468	AC011380.8	Brain_Frontal_Cortex_BA9
ENSG00000234155.1	6	85390185	85390186	0.1651	rs9362215	4.42	rs9450270	0.02396	4.23	3.9421	444	5	lasso	0.049	0.0018	4.74257	2.11e-06	0.00867964	RP11-30P6.6	Brain_Frontal_Cortex_BA9
ENSG00000022567.9	8	141308304	141308305	0.2586	rs7824374	-3.97	rs10092931	0.001426	-4.02	2.61558	477	19	enet	0.013	0.073	-4.6325	3.61e-06	0.0106009	SLC45A4	Brain_Frontal_Cortex_BA9
ENSG00000122863.5	10	71964364	71964365	0.141	rs4148946	-5.64	rs1668160	0.0209	3.97	-4.663	553	1	top1	0.021	0.035	-4.66302	3.12e-06	0.00991339	CHST3	Brain_Hippocampus
ENSG00000281026.1	13	32509394	32509395	0.164	rs499966	4.62	rs1324414	-0.00192	-3.36	4.226	477	4	lasso	0.01	0.1	-4.88738	1.02e-06	0.00648183	N4BP2L2-IT2	Brain_Hippocampus
ENSG00000144214.9	2	99304741	99304742	0.1765	rs12479064	4.36	rs3087403	0.0121	4.1	4.09321	312	7	lasso	0.054	0.0016	4.0888	4.34e-05	0.0377638	LYG1	Brain_Hippocampus
ENSG00000283602.1	5	140594569	140594570	0.2718	rs4279384	4.1	rs6860077	0.142061	5.43	3.97313	328	1	top1	0.14	3.6e-07	3.97313	7.09e-05	0.0456467	AC011380.8	Brain_Hippocampus
ENSG00000103485.17	16	29679007	29679008	0.4243	rs35042042	4.15	rs9933310	0.205625	-5.97	-3.87326	182	2	lasso	0.21	2.7e-10	3.987	6.69e-05	0.0451983	QPRT	Brain_Hypothalamus
ENSG00000169599.12	2	69437627	69437628	0.1287	rs13429805	4.98	rs6724567	0.0453	3.64	4.96964	396	2	lasso	0.076	0.00016	4.57085	4.86e-06	0.0128683	NFU1	Brain_Hypothalamus
ENSG00000173421.16	3	49198427	49198428	0.172	rs10865954	4.42	rs4974080	0.00246	-3.34	2.98983	259	259	susie	0.012	0.085	-4.39967	1.08e-05	0.0197216	CCDC36	Brain_Hypothalamus
ENSG00000233276.3	3	49358599	49358600	0.1139	rs10865954	4.42	rs6772452	0.04284	3.98	2.73145	277	277	susie	0.057	0.001	4.14953	3.33e-05	0.032551	GPX1	Brain_Hypothalamus
ENSG00000178222.12	4	1113561	1113562	0.2031	rs2242278	4.8	rs2127908	0.049673	-4.68	-4.29049	384	384	susie	0.087	5.6e-05	4.66303	3.12e-06	0.00991339	RNF212	Brain_Hypothalamus
ENSG00000283602.1	5	140594569	140594570	0.2799	rs4279384	4.1	rs6860077	0.199156	5.97	3.9731	329	1	top1	0.2	6.4e-10	3.97313	7.09e-05	0.0456467	AC011380.8	Brain_Hypothalamus
ENSG00000260306.1	16	21795758	21795759	0.4219	rs161330	-5.86	rs4783412	0.086235	-5.55	-2.569	137	137	susie	0.37	5e-22	4.4406	8.97e-06	0.0188748	RP11-645C24.5	Brain_Nucleus_accumbens_basal_ganglia
ENSG00000279602.1	17	43361360	43361361	0.2005	rs9912587	4.1	rs3737559	0.05661	-5.14	3.86096	301	4	lasso	0.11	7.1e-07	-4.33494	1.46e-05	0.0232709	CTD-3014M21.1	Brain_Nucleus_accumbens_basal_ganglia
ENSG00000138100.13	2	27282391	27282392	0.1258	rs4666001	-4.67	rs6734059	0.00734	-3.15	-2.07563	309	309	susie	0.032	0.0062	4.58568	4.53e-06	0.0122517	TRIM54	Brain_Nucleus_accumbens_basal_ganglia
ENSG00000169599.12	2	69437627	69437628	0.2108	rs13429805	4.98	rs7559850	0.00844	3.57	4.54682	390	390	susie	0.026	0.013	4.65483	3.24e-06	0.0100928	NFU1	Brain_Nucleus_accumbens_basal_ganglia
ENSG00000283602.1	5	140594569	140594570	0.341	rs4279384	4.1	rs4279384	0.256	7.4	4.10147	328	328	susie	0.26	6.1e-15	4.10292	4.08e-05	0.0368468	AC011380.8	Brain_Nucleus_accumbens_basal_ganglia
ENSG00000234155.1	6	85390185	85390186	0.1949	rs9362215	4.42	rs9359655	0.048908	5.25	4.2365	444	444	susie	0.079	3.1e-05	4.15	3.34e-05	0.032551	RP11-30P6.6	Brain_Nucleus_accumbens_basal_ganglia
ENSG00000260306.1	16	21795758	21795759	0.4846	rs161330	-5.86	rs4783412	0.14803	-5.43	-2.56903	137	14	enet	0.31	2.9e-15	4.00035	6.32e-05	0.044134	RP11-645C24.5	Brain_Putamen_basal_ganglia
ENSG00000169599.12	2	69437627	69437628	0.0909	rs13429805	4.98	rs7559850	0.0207	3.78	4.54682	396	3	lasso	0.039	0.0057	4.54847	5.4e-06	0.0140638	NFU1	Brain_Putamen_basal_ganglia
ENSG00000213523.10	5	140558251	140558252	0.3377	rs4279384	4.1	rs1835148	0.129381	-5.38	4.06773	328	328	susie	0.15	1.5e-07	-4.08259	4.45e-05	0.0383861	SRA1	Brain_Putamen_basal_ganglia
ENSG00000283602.1	5	140594569	140594570	0.4094	rs4279384	4.1	rs6871703	0.279189	7.41	4.00373	328	328	susie	0.31	1.3e-15	4.02213	5.77e-05	0.042122	AC011380.8	Brain_Putamen_basal_ganglia
ENSG00000224020.1	9	124658466	124658467	0.1072	rs2274970	4.7	rs10760376	0.063081	-3.85	3.97259	339	1	top1	0.063	0.00056	-3.9726	7.11e-05	0.0456467	MIR181A2HG	Brain_Putamen_basal_ganglia
ENSG00000213523.10	5	140558251	140558252	0.194	rs4279384	4.1	rs1862176	0.132134	-4.85	3.97	327	327	susie	0.18	5.7e-07	-3.93	8.36e-05	0.0497431	SRA1	Brain_Spinal_cord_cervical_c-1
ENSG00000160867.14	5	177086885	177086886	0.138	rs353489	4.15	rs1700490	-0.002753	3.59	4.06	380	1	top1	-0.0028	0.42	4.06	4.92e-05	0.0389842	FGFR4	Brain_Spinal_cord_cervical_c-1
ENSG00000213523.10	5	140558251	140558252	0.376	rs4279384	4.1	rs4279384	0.228165	-5.56	4.1015	328	328	susie	0.25	1.1e-08	-4.3421	1.41e-05	0.0229748	SRA1	Brain_Substantia_nigra
ENSG00000283602.1	5	140594569	140594570	0.194	rs4279384	4.1	rs4279384	0.155082	4.63	4.1015	328	328	susie	0.16	7.7e-06	4.0299	5.58e-05	0.041717	AC011380.8	Brain_Substantia_nigra
ENSG00000279067.1	7	96118646	96118647	0.191	rs7811725	4.92	rs10227959	0.00563	-3.42	2.66787	426	426	susie	0.058	0.0058	-4.35241	1.35e-05	0.0224579	GS1-25M2.1	Brain_Substantia_nigra
ENSG00000107742.12	10	72089031	72089032	0.0766	rs4148946	-5.64	rs3312	0.071961	5.93	4.2207	474	5	lasso	0.08	5.6e-09	4.35955	1.3e-05	0.0222416	SPOCK2	Breast_Mammary_Tissue
ENSG00000138303.17	10	72217133	72217134	0.2762	rs4148946	-5.64	rs1245543	0.034059	-4.92	3.7537	411	6	lasso	0.058	7.1e-07	-4.07043	4.69e-05	0.0388982	ASCC1	Breast_Mammary_Tissue
ENSG00000258708.1	14	37171887	37171888	0.0645	rs1950526	-5.11	rs7153180	0.038259	-4.89	-4.12945	465	465	susie	0.041	2.9e-05	4.51746	6.26e-06	0.0153003	SLC25A21-AS1	Breast_Mammary_Tissue
ENSG00000151338.18	14	37197912	37197913	0.1259	rs1950526	-5.11	rs11156962	0.017856	4.26	-4.95379	446	446	susie	0.035	0.00012	-3.98161	6.85e-05	0.0456467	MIPOL1	Breast_Mammary_Tissue
ENSG00000169599.12	2	69437627	69437628	0.0545	rs13429805	4.98	rs5017686	0.0194	4.26	4.85768	383	3	lasso	0.026	0.00077	5.0876	3.63e-07	0.00477701	NFU1	Breast_Mammary_Tissue
ENSG00000177352.9	3	49166320	49166321	0.0507	rs10865954	4.42	rs4955426	0.0163	4.09	2.35485	260	10	enet	0.026	0.00068	4.18217	2.89e-05	0.0301069	CCDC71	Breast_Mammary_Tissue
ENSG00000173421.16	3	49198427	49198428	0.1444	rs10865954	4.42	rs6791542	0.0751	-5.88	2.93112	260	18	enet	0.079	8.4e-09	-3.94904	7.85e-05	0.0480585	CCDC36	Breast_Mammary_Tissue
ENSG00000164068.15	3	49689501	49689502	0.1868	rs2029591	4.29	rs11130218	0.117	8.02	3.19569	318	318	susie	0.19	1e-19	4.0135	5.98e-05	0.0427943	RNF123	Breast_Mammary_Tissue
ENSG00000173540.12	3	49723950	49723951	0.2663	rs2029591	4.29	rs4855882	0.259	10.82	3.75649	320	13	enet	0.29	9.9e-32	4.06807	4.74e-05	0.0388982	GMPPB	Breast_Mammary_Tissue
ENSG00000178222.12	4	1113561	1113562	0.1991	rs2242278	4.8	rs651017	0.0366	5.23	1.61795	385	21	enet	0.11	6.3e-12	4.7173	2.39e-06	0.00886133	RNF212	Breast_Mammary_Tissue
ENSG00000273179.1	4	1167777	1167778	0.0926	rs2242278	4.8	rs11247975	0.0498	4.68	-4.32137	384	1	top1	0.05	4.4e-06	-4.3214	1.55e-05	0.0232709	RP11-20I20.4	Breast_Mammary_Tissue
ENSG00000243056.1	5	140547665	140547666	0.1394	rs4279384	4.1	rs6871703	0.0552	5.41	3.99675	327	327	susie	0.058	7.9e-07	4.16156	3.16e-05	0.0315739	EIF4EBP3	Breast_Mammary_Tissue
ENSG00000283602.1	5	140594569	140594570	0.1507	rs4279384	4.1	rs250429	0.104	7.56	4.06273	328	328	susie	0.13	1.8e-13	4.0218	5.78e-05	0.042122	AC011380.8	Breast_Mammary_Tissue
ENSG00000170458.13	5	140633700	140633701	0.0513	rs4279384	4.1	rs1835148	0.0316	4.46	4.06773	345	1	top1	0.032	0.00022	4.06773	4.75e-05	0.0388982	CD14	Breast_Mammary_Tissue
ENSG00000135336.14	6	87590066	87590067	0.1032	rs2787933	3.72	rs2787933	0.00836	4.11	3.72064	444	14	enet	0.026	0.0008	3.94593	7.95e-05	0.0482985	ORC3	Breast_Mammary_Tissue
ENSG00000122863.5	10	71964364	71964365	0.1107	rs4148946	-5.64	rs731027	0.113	7.57	5.12724	544	1	top1	0.11	2e-14	5.12724	2.94e-07	0.00467073	CHST3	Cells_Cultured_fibroblasts
ENSG00000083642.18	13	32586426	32586427	0.0471	rs499966	4.57	rs7332115	0.022349	4.17	4.30178	486	1	lasso	0.026	0.00023	4.30178	1.69e-05	0.0240796	PDS5B	Cells_Cultured_fibroblasts
ENSG00000183032.11	14	36875003	36875004	0.2012	rs1950526	-5.11	rs7151191	0.15122	9.19	-4.83532	536	7	lasso	0.2	9.9e-26	-4.42068	9.84e-06	0.0189111	SLC25A21	Cells_Cultured_fibroblasts
ENSG00000151338.18	14	37197912	37197913	0.2528	rs1950526	-5.11	rs1950526	0.263557	11.97	-5.11367	452	35	enet	0.32	8.4e-43	-4.99534	5.87e-07	0.00481494	MIPOL1	Cells_Cultured_fibroblasts
ENSG00000167371.17	16	29811985	29811986	0.1677	rs35042042	4.06	rs4788186	0.0609	5.58	-2.56024	154	28	enet	0.078	2.7e-10	-4.16716	3.08e-05	0.0314672	PRRT2	Cells_Cultured_fibroblasts
ENSG00000198373.12	16	69762305	69762306	0.0805	rs16959025	-3.95	rs1808417	0.0023	3.09	3.24796	252	252	susie	0.014	0.0051	4.53702	5.71e-06	0.0146825	WWP2	Cells_Cultured_fibroblasts
ENSG00000169599.12	2	69437627	69437628	0.166	rs13429805	4.98	rs6759021	0.0501	-6.27	-3.49317	373	14	enet	0.069	3e-09	4.62001	3.84e-06	0.0108818	NFU1	Cells_Cultured_fibroblasts
ENSG00000158417.10	2	99337352	99337353	0.0365	rs12479064	4.45	rs4851203	0.00655	4.29	4.03375	320	320	susie	0.0085	0.024	4.18519	2.85e-05	0.0299851	EIF5B	Cells_Cultured_fibroblasts
ENSG00000183671.12	2	206218046	206218047	0.1424	rs17288678	-5.04	rs17288678	0.0666	6.71	-5.04127	427	18	enet	0.1	6.6e-13	-5.01111	5.41e-07	0.00481494	GPR1	Cells_Cultured_fibroblasts
ENSG00000186448.14	3	44584887	44584888	0.1983	rs7616538	4.32	rs12635624	0.116	7.89	-3.92801	319	31	enet	0.14	2.3e-17	-4.11536	3.87e-05	0.0356418	ZNF197	Cells_Cultured_fibroblasts
ENSG00000185909.14	3	49171610	49171611	0.154	rs10865954	4.42	rs7617480	0.123	8.05	4.36312	262	11	lasso	0.12	1e-15	4.02301	5.75e-05	0.0420965	KLHDC8B	Cells_Cultured_fibroblasts
ENSG00000226913.1	3	49554365	49554366	0.0652	rs10865954	4.42	rs4955420	0.014	4.22	4.41444	303	1	top1	0.014	0.0053	4.41444	1.01e-05	0.018989	BSN-AS2	Cells_Cultured_fibroblasts
ENSG00000174564.12	3	136957864	136957865	0.7148	rs13099657	3.75	rs17301365	0.333	-12.77	-3.39671	333	35	enet	0.49	2.1e-72	4.64068	3.47e-06	0.0106009	IL20RB	Cells_Cultured_fibroblasts
ENSG00000249407.1	3	136982158	136982159	0.1324	rs13099657	3.76	rs171519	0.0474	5.99	2.94867	341	14	enet	0.1	3e-13	4.52978	5.9e-06	0.014761	IL20RB-AS1	Cells_Cultured_fibroblasts
ENSG00000178222.12	4	1113561	1113562	0.1495	rs2242278	4.8	rs2127908	0.045819	-5.27	-4.29049	383	1	top1	0.046	1.2e-06	4.29049	1.78e-05	0.0241697	RNF212	Cells_Cultured_fibroblasts
ENSG00000273179.1	4	1167777	1167778	0.1252	rs2242278	4.8	rs11247975	0.063805	5.8	-4.32137	381	3	lasso	0.066	5.7e-09	-4.26414	2.01e-05	0.0256199	RP11-20I20.4	Cells_Cultured_fibroblasts
ENSG00000163257.10	4	17810757	17810758	0.1289	rs2320288	3.77	rs6844379	0.075666	6.54	-3.72218	375	12	enet	0.099	9.8e-13	-4.03127	5.55e-05	0.0416889	DCAF16	Cells_Cultured_fibroblasts
ENSG00000112343.10	6	25962801	25962802	0.1706	rs6935954	5.72	rs10425	0.018811	5.23	1.86302	657	63	enet	0.034	2.6e-05	4.46056	8.17e-06	0.017897	TRIM38	Cells_Cultured_fibroblasts
ENSG00000136267.13	7	14974776	14974777	0.517	rs2215430	4.27	rs4721380	0.405064	14.27	4.124	538	538	susie	0.49	2.9e-72	4.1655	3.11e-05	0.0314711	DGKB	Cells_Cultured_fibroblasts
ENSG00000213542.3	7	77116191	77116192	0.0707	rs10278476	3.72	rs10278476	0.004347	3.93	3.72346	283	6	enet	0.012	0.0082	3.94456	7.99e-05	0.0484488	RP11-467H10.1	Cells_Cultured_fibroblasts
ENSG00000004864.13	7	96322146	96322147	0.0296	rs7811725	4.92	rs4729236	0.054159	-5.39	4.13178	422	1	top1	0.054	1.4e-07	-4.13178	3.6e-05	0.0340165	SLC25A13	Cells_Cultured_fibroblasts
ENSG00000122863.5	10	71964364	71964365	0.2681	rs4148946	-5.64	rs4148949	0.085684	4.72	-5.6165	546	546	susie	0.086	0.00019	-5.6817	1.33e-08	0.00192407	CHST3	Cells_EBV-transformed_lymphocytes
ENSG00000279123.1	16	70778432	70778433	0.1788	rs7192865	4.19	rs235990	0.0156	3.24	-3.40364	187	187	susie	0.03	0.021	-4.32046	1.56e-05	0.0232709	RP11-424M24.3	Cells_EBV-transformed_lymphocytes
ENSG00000280046.1	17	7858942	7858943	0.365	rs17807204	3.95	rs1565816	0.152	5.12	3.42642	508	13	lasso	0.18	8e-08	4.03439	5.47e-05	0.0415096	RP11-1099M24.6	Cells_EBV-transformed_lymphocytes
ENSG00000135318.11	6	85449583	85449584	0.565	rs9362215	4.42	rs4487548	0.304	-6.99	4.27643	432	432	susie	0.32	3.4e-14	-4.253	2.11e-05	0.0256868	NT5E	Cells_EBV-transformed_lymphocytes
ENSG00000004864.13	7	96322146	96322147	0.2073	rs7811725	4.92	rs3936186	0.003631	3.72	4.68233	428	428	susie	0.026	0.03	4.35626	1.32e-05	0.0222416	SLC25A13	Cells_EBV-transformed_lymphocytes
ENSG00000203499.11	8	143734139	143734140	0.2327	rs3829020	3.69	rs3829018	-0.00185	-2.9	3.5135	314	13	enet	0.00092	0.29	-4.3551	1.33e-05	0.0222416	FAM83H-AS1	Cells_EBV-transformed_lymphocytes
ENSG00000122863.5	10	71964364	71964365	0.242	rs4148946	-5.64	rs4148947	0.177746	8.23	4.85132	561	561	susie	0.2	4.3e-17	4.90178	9.5e-07	0.00642234	CHST3	Colon_Sigmoid
ENSG00000107742.12	10	72089031	72089032	0.0869	rs4148946	-5.64	rs3312	-0.000101	3.94	4.22072	488	6	enet	0.019	0.0077	4.29501	1.75e-05	0.0241697	SPOCK2	Colon_Sigmoid
ENSG00000258708.1	14	37171887	37171888	0.0946	rs1950526	-5.11	rs7153180	0.065817	-4.83	-4.13	467	1	top1	0.066	2.1e-06	4.12945	3.64e-05	0.0340165	SLC25A21-AS1	Colon_Sigmoid
ENSG00000178222.12	4	1113561	1113562	0.2184	rs2242278	4.8	rs2127908	0.061577	-5.62	-4.29049	385	385	susie	0.1	2.1e-09	4.74851	2.05e-06	0.00857054	RNF212	Colon_Sigmoid
ENSG00000273179.1	4	1167777	1167778	0.1287	rs2242278	4.8	rs17164380	0.064396	-5.43	4.70702	384	384	susie	0.078	2.6e-07	-5.30882	1.1e-07	0.0024965	RP11-20I20.4	Colon_Sigmoid
ENSG00000283602.1	5	140594569	140594570	0.2043	rs4279384	4.1	rs250424	0.095635	6.61	4.07	328	328	susie	0.12	2.1e-10	4.06001	4.91e-05	0.0389842	AC011380.8	Colon_Sigmoid
ENSG00000146147.14	6	53929981	53929982	0.1589	rs10948797	4.78	rs10948797	0.05	-5.21	4.77867	558	5	lasso	0.055	1.4e-05	-4.48518	7.29e-06	0.0167848	MLIP	Colon_Sigmoid
ENSG00000197576.13	7	27130798	27130799	0.1751	rs7799519	-4.83	rs34957925	0.010425	4.77	-3.65298	393	19	enet	0.023	0.0036	-4.32	1.53e-05	0.0232709	HOXA4	Colon_Sigmoid
ENSG00000122863.5	10	71964364	71964365	0.2654	rs4148946	-5.64	rs1245519	0.090931	6.75	4.69757	549	549	susie	0.11	4.2e-11	4.67573	2.93e-06	0.0096976	CHST3	Colon_Transverse
ENSG00000107742.12	10	72089031	72089032	0.1128	rs4148946	-5.64	rs1245509	0.042577	-5.09	-3.94624	476	10	enet	0.057	2e-06	4.27688	1.9e-05	0.0246408	SPOCK2	Colon_Transverse
ENSG00000244754.8	13	32538884	32538885	0.0711	rs499966	4.59	rs11840502	0.023725	4.31	4.25442	480	480	susie	0.027	0.00094	4.0778	4.55e-05	0.0387588	N4BP2L2	Colon_Transverse
ENSG00000258708.1	14	37171887	37171888	0.1191	rs1950526	-5.11	rs7153180	0.14952	-7.64	-4.12945	469	1	top1	0.15	8.6e-15	4.12945	3.64e-05	0.0340165	SLC25A21-AS1	Colon_Transverse
ENSG00000258414.1	14	37564046	37564047	0.0572	rs1950526	-5.11	rs7153867	0.040076	4.13	-4.94084	304	1	top1	0.04	6.5e-05	-4.94084	7.78e-07	0.00602925	RP11-356O9.1	Colon_Transverse
ENSG00000259087.5	14	37567094	37567095	0.1797	rs1950526	-5.11	rs1008236	0.148332	8.23	-4.37479	304	8	lasso	0.16	3.2e-16	-4.778	1.77e-06	0.00777168	RP11-356O9.2	Colon_Transverse
ENSG00000139865.16	14	37595846	37595847	0.0741	rs1950526	-5.11	rs10400689	0.01763	4.82	-4.71984	312	3	lasso	0.035	0.00019	-4.4998	6.8e-06	0.016124	TTC6	Colon_Transverse
ENSG00000279026.1	14	73580693	73580694	0.4039	rs12435797	2.47	rs17128948	0.003448	-4.86	1.82804	366	69	enet	0.08	2.1e-08	-4.36357	1.28e-05	0.0222242	RP3-414A15.12	Colon_Transverse
ENSG00000260306.1	16	21795758	21795759	0.6079	rs161330	-5.63	rs4783414	0.186407	-8.39	-2.83053	133	133	susie	0.3	3e-30	3.97556	7.02e-05	0.0456467	RP11-645C24.5	Colon_Transverse
ENSG00000183011.13	17	7885237	7885238	0.2013	rs17807204	3.95	rs11078711	0.0539	5.33	3.92537	508	6	lasso	0.089	3.3e-09	4.1657	3.1e-05	0.0314711	NAA38	Colon_Transverse
ENSG00000169599.12	2	69437627	69437628	0.0816	rs13429805	4.98	rs13751	0.0312	4.64	4.92457	382	15	enet	0.049	1.1e-05	4.68547	2.79e-06	0.00933143	NFU1	Colon_Transverse
ENSG00000144214.9	2	99304741	99304742	0.2034	rs12479064	4.36	rs12464785	0.124	8.1	3.51571	312	22	enet	0.18	6e-18	4.24684	2.17e-05	0.0259206	LYG1	Colon_Transverse
ENSG00000082438.15	2	164843678	164843679	0.0826	rs10803794	4.1	rs10803794	0.00941	-4.01	4.0969	379	1	top1	0.0094	0.035	-4.0969	4.19e-05	0.0371877	COBLL1	Colon_Transverse
ENSG00000164068.15	3	49689501	49689502	0.1935	rs2029591	4.29	rs2271961	0.0949	7.58	3.16741	316	316	susie	0.15	6.1e-15	4.04596	5.21e-05	0.0399857	RNF123	Colon_Transverse
ENSG00000178222.12	4	1113561	1113562	0.2336	rs2242278	4.8	rs7659624	0.035367	-5.18	-4.37832	385	19	enet	0.084	8.5e-09	5.06787	4.02e-07	0.00477701	RNF212	Colon_Transverse
ENSG00000273179.1	4	1167777	1167778	0.2462	rs2242278	4.8	rs11247975	0.153841	7.77	-4.32137	383	30	enet	0.16	1.2e-15	-4.53619	5.73e-06	0.0146825	RP11-20I20.4	Colon_Transverse
ENSG00000188152.12	9	96928309	96928310	0.1226	rs16918311	3.69	rs2479209	0.023214	4.56	2.6691	230	19	enet	0.035	0.00017	4.1078	3.99e-05	0.0364168	NUTM2G	Colon_Transverse
ENSG00000258708.1	14	37171887	37171888	0.1031	rs1950526	-5.11	rs10150919	0.039722	-4.74	-4.3867	465	1	top1	0.04	0.00016	4.38665	1.15e-05	0.020528	SLC25A21-AS1	Esophagus_Gastroesophageal_Junction
ENSG00000260306.1	16	21795758	21795759	0.5514	rs161330	-5.86	rs4783414	0.232746	-9.01	-2.83053	136	136	susie	0.36	1.1e-33	4.2021	2.64e-05	0.0293296	RP11-645C24.5	Esophagus_Gastroesophageal_Junction
ENSG00000103051.18	16	70523564	70523565	0.2768	rs7192865	4.19	rs7192865	0.022216	-4.32	4.19081	155	1	top1	0.022	0.0038	-4.19081	2.78e-05	0.0295421	COG4	Esophagus_Gastroesophageal_Junction
ENSG00000132510.10	17	7839903	7839904	0.1549	rs17807204	3.95	rs11078711	0.066759	-5.12	3.92537	517	5	lasso	0.067	1.1e-06	-3.99699	6.42e-05	0.0446081	KDM6B	Esophagus_Gastroesophageal_Junction
ENSG00000141458.12	18	23586897	23586898	0.3171	rs2337024	-4.18	rs4800488	0.209	8.78	-3.7036	365	365	susie	0.23	1e-20	-4.02471	5.7e-05	0.0420946	NPC1	Esophagus_Gastroesophageal_Junction
ENSG00000169599.12	2	69437627	69437628	0.0805	rs13429805	4.98	rs13751	0.003147	4.01	4.92457	387	387	susie	0.026	0.0019	4.99722	5.82e-07	0.00481494	NFU1	Esophagus_Gastroesophageal_Junction
ENSG00000183671.12	2	206218046	206218047	0.2037	rs17288678	-5.04	rs17289237	0.020257	4.53	-4.37921	428	23	enet	0.044	6.9e-05	-4.02303	5.75e-05	0.0420965	GPR1	Esophagus_Gastroesophageal_Junction
ENSG00000164068.15	3	49689501	49689502	0.1881	rs2029591	4.29	rs6785549	0.114036	7.06	3.19569	316	316	susie	0.16	2.4e-14	4.17961	2.92e-05	0.0302212	RNF123	Esophagus_Gastroesophageal_Junction
ENSG00000178222.12	4	1113561	1113562	0.3318	rs2242278	4.8	rs2127908	0.0249	-5.89	-4.29049	383	383	susie	0.11	2.1e-10	4.27684	1.9e-05	0.0246408	RNF212	Esophagus_Gastroesophageal_Junction
ENSG00000273179.1	4	1167777	1167778	0.2329	rs2242278	4.8	rs11247975	0.143	6.94	-4.32137	382	1	top1	0.14	7.4e-13	-4.32137	1.55e-05	0.0232709	RP11-20I20.4	Esophagus_Gastroesophageal_Junction
ENSG00000283602.1	5	140594569	140594570	0.212	rs4279384	4.1	rs4279384	0.116	6.68	4.10147	328	328	susie	0.12	1.2e-10	4.10071	4.12e-05	0.0368468	AC011380.8	Esophagus_Gastroesophageal_Junction
ENSG00000122863.5	10	71964364	71964365	0.1524	rs4148946	-5.64	rs731027	0.061451	6.03	5.12824	548	1	top1	0.061	1.3e-08	5.12824	2.92e-07	0.00467073	CHST3	Esophagus_Mucosa
ENSG00000150977.10	12	123436716	123436717	0.1383	rs28466887	4.92	rs1707730	0.030284	5.73	4.85039	365	10	enet	0.053	1.2e-07	4.21861	2.46e-05	0.0280155	RILPL2	Esophagus_Mucosa
ENSG00000244754.8	13	32538884	32538885	0.0598	rs499966	4.59	rs7328733	0.020713	4.95	4.29549	477	2	lasso	0.03	6.4e-05	4.18978	2.79e-05	0.0295495	N4BP2L2	Esophagus_Mucosa
ENSG00000258708.1	14	37171887	37171888	0.0797	rs1950526	-5.11	rs8012018	0.070058	-6.11	-4.26001	465	1	top1	0.07	1.2e-09	4.26001	2.04e-05	0.0256199	SLC25A21-AS1	Esophagus_Mucosa
ENSG00000151338.18	14	37197912	37197913	0.127	rs1950526	-5.11	rs8019713	0.009809	4.53	-4.56031	446	16	enet	0.024	0.00028	-4.38792	1.14e-05	0.020528	MIPOL1	Esophagus_Mucosa
ENSG00000139865.16	14	37595846	37595847	0.0608	rs1950526	-5.11	rs1884803	0.01861	4.38	-4.70678	305	305	susie	0.026	0.00018	-4.69106	2.72e-06	0.00919409	TTC6	Esophagus_Mucosa
ENSG00000169599.12	2	69437627	69437628	0.1193	rs13429805	4.98	rs13751	0.0412	5.02	4.92457	378	1	top1	0.041	3e-06	4.92457	8.45e-07	0.00621754	NFU1	Esophagus_Mucosa
ENSG00000144214.9	2	99304741	99304742	0.1185	rs12479064	4.36	rs3087403	0.0439	6.16	4.09321	312	26	enet	0.069	1.7e-09	4.03032	5.57e-05	0.041717	LYG1	Esophagus_Mucosa
ENSG00000164062.12	3	49674001	49674002	0.5508	rs10865954	4.42	rs13100791	0.09441	8.95	-2.72037	319	47	enet	0.21	1e-27	-3.94603	7.95e-05	0.0482985	APEH	Esophagus_Mucosa
ENSG00000178222.12	4	1113561	1113562	0.08	rs2242278	4.8	rs6826705	0.00545	-4.27	-4.2222	385	385	susie	0.02	0.00087	4.32404	1.53e-05	0.0232709	RNF212	Esophagus_Mucosa
ENSG00000273179.1	4	1167777	1167778	0.1545	rs2242278	4.8	rs2242278	0.0568	-6.58	4.79582	383	16	enet	0.084	2.8e-11	-5.10508	3.31e-07	0.00477701	RP11-20I20.4	Esophagus_Mucosa
ENSG00000243056.1	5	140547665	140547666	0.0566	rs4279384	4.1	rs250424	0.053007	5.47	4.06967	328	1	top1	0.053	1.3e-07	4.06967	4.71e-05	0.0388982	EIF4EBP3	Esophagus_Mucosa
ENSG00000087206.16	5	177022601	177022602	0.1003	rs353489	4.15	rs1700490	0.072083	6.21	4.05942	384	1	top1	0.072	7.1e-10	4.05942	4.92e-05	0.0389842	UIMC1	Esophagus_Mucosa
ENSG00000122863.5	10	71964364	71964365	0.0826	rs4148946	-5.64	rs731027	0.0134	4.82	5.13042	550	550	susie	0.027	0.00022	5.0071	5.53e-07	0.00481494	CHST3	Esophagus_Muscularis
ENSG00000258708.1	14	37171887	37171888	0.1138	rs1950526	-5.11	rs8012018	0.0952	-7	-4.26022	464	1	top1	0.095	6.2e-12	4.26022	2.04e-05	0.0256199	SLC25A21-AS1	Esophagus_Muscularis
ENSG00000151338.18	14	37197912	37197913	0.0601	rs1950526	-5.11	rs7153867	0.014	4.31	-4.94084	445	445	susie	0.021	0.001	-4.86638	1.14e-06	0.00656309	MIPOL1	Esophagus_Muscularis
ENSG00000260306.1	16	21795758	21795759	0.6092	rs161330	-5.86	rs4783412	0.164192	-8.91	-2.56903	137	137	susie	0.39	6.3e-52	3.99563	6.45e-05	0.0446493	RP11-645C24.5	Esophagus_Muscularis
ENSG00000103485.17	16	29679007	29679008	0.1102	rs35042042	4.15	rs12596308	0.025106	5.36	2.62773	181	7	enet	0.044	2.8e-06	4.00953	6.08e-05	0.0433148	QPRT	Esophagus_Muscularis
ENSG00000090857.13	16	70113625	70113626	0.0655	rs7192865	4.19	rs12447090	0.030949	-4.82	3.96055	188	8	enet	0.04	7.8e-06	-4.07509	4.6e-05	0.0388721	PDPR	Esophagus_Muscularis
ENSG00000183671.12	2	206218046	206218047	0.0971	rs17288678	-5.04	rs17222585	0.033	5.38	-4.37491	428	428	susie	0.041	5.9e-06	-4.5313	5.86e-06	0.014761	GPR1	Esophagus_Muscularis
ENSG00000067560.10	3	49412201	49412202	0.0235	rs10865954	4.42	rs9831648	0.001068	3.51	4.22568	288	288	susie	0.0091	0.022	4.42701	9.55e-06	0.0189111	RHOA	Esophagus_Muscularis
ENSG00000178222.12	4	1113561	1113562	0.2623	rs2242278	4.8	rs2127908	0.092073	-6.98	-4.29049	385	385	susie	0.15	4.9e-18	4.35	1.37e-05	0.0226719	RNF212	Esophagus_Muscularis
ENSG00000273179.1	4	1167777	1167778	0.1931	rs2242278	4.8	rs11247975	0.122413	7.87	-4.32137	383	10	enet	0.13	4.8e-16	-5.49	4.05e-08	0.00192407	RP11-20I20.4	Esophagus_Muscularis
ENSG00000176087.14	5	140564689	140564690	0.0404	rs4279384	4.1	rs250424	0.0344	-4.73	4.06967	331	1	top1	0.034	3.4e-05	-4.06967	4.71e-05	0.0388982	SLC35A4	Esophagus_Muscularis
ENSG00000283602.1	5	140594569	140594570	0.1848	rs4279384	4.1	rs4279384	0.127	7.98	4.10147	330	1	top1	0.13	1.4e-15	4.10147	4.11e-05	0.0368468	AC011380.8	Esophagus_Muscularis
ENSG00000087206.16	5	177022601	177022602	0.1001	rs353489	4.16	rs1700490	0.0514	6.06	4.05942	386	16	enet	0.052	3.9e-07	4.08161	4.47e-05	0.0383861	UIMC1	Esophagus_Muscularis
ENSG00000197816.13	9	97307360	97307361	0.2159	rs16918311	4.14	rs10759619	0.053236	-6.49	-2.42253	318	25	enet	0.087	5e-11	4.3038	1.68e-05	0.0240796	CCDC180	Esophagus_Muscularis
ENSG00000181830.8	11	45804071	45804072	0.1435	rs7130134	-3.19	rs2959101	0.019897	-4.39	-1.66431	394	20	enet	0.094	9.8e-10	4.06305	4.84e-05	0.0389842	SLC35C1	Heart_Atrial_Appendage
ENSG00000258708.1	14	37171887	37171888	0.1809	rs1950526	-5.11	rs10145536	0.148652	-7.79	-4.40591	468	1	top1	0.15	7.5e-15	4.40591	1.05e-05	0.0193967	SLC25A21-AS1	Heart_Atrial_Appendage
ENSG00000151338.18	14	37197912	37197913	0.1383	rs1950526	-5.11	rs1814005	0.046719	5.57	-4.78095	449	449	susie	0.063	5.9e-07	-4.93471	8.03e-07	0.00607483	MIPOL1	Heart_Atrial_Appendage
ENSG00000260306.1	16	21795758	21795759	0.4121	rs161330	-5.86	rs4783412	0.0578	-6.25	-2.569	137	137	susie	0.2	5.1e-20	4.49037	7.11e-06	0.0164899	RP11-645C24.5	Heart_Atrial_Appendage
ENSG00000103485.17	16	29679007	29679008	0.1898	rs35042042	4.14	rs12447415	0.0632	-5.27	-3.7803	180	10	enet	0.067	2.5e-07	4.71102	2.46e-06	0.00886133	QPRT	Heart_Atrial_Appendage
ENSG00000167371.17	16	29811985	29811986	0.1267	rs35042042	4.1	rs3815822	0.000824	2.98	-2.6031	156	17	enet	0.0029	0.15	-4.45918	8.23e-06	0.017897	PRRT2	Heart_Atrial_Appendage
ENSG00000090857.13	16	70113625	70113626	0.0887	rs7192865	4.19	rs1808417	0.0354	-5.01	3.248	189	13	enet	0.048	1.3e-05	-4.48015	7.46e-06	0.0170526	PDPR	Heart_Atrial_Appendage
ENSG00000196535.15	17	29180411	29180412	0.0941	rs8067041	-4.08	rs9906043	0.0374	-4.55	-4.03857	335	17	enet	0.051	6.3e-06	3.979	6.92e-05	0.0456467	MYO18A	Heart_Atrial_Appendage
ENSG00000101017.13	20	46118271	46118272	0.1603	rs12624433	3.84	rs1883832	0.037746	-5.69	3.7923	500	16	enet	0.089	2.7e-09	-4.1384	3.5e-05	0.0332958	CD40	Heart_Atrial_Appendage
ENSG00000198380.12	2	69387253	69387254	0.0711	rs6724567	4.97	rs7424376	0.00017	-4.03	-2.67135	400	400	susie	0.02	0.0035	4.84605	1.26e-06	0.00656309	GFPT1	Heart_Atrial_Appendage
ENSG00000173540.12	3	49723950	49723951	0.238	rs2029591	4.29	rs9824435	0.252	10.03	3.77393	318	22	enet	0.27	4.3e-27	4.07544	4.59e-05	0.0388721	GMPPB	Heart_Atrial_Appendage
ENSG00000178222.12	4	1113561	1113562	0.1319	rs2242278	4.8	rs2127908	0.0445	-5.18	-4.29049	385	4	lasso	0.064	4.7e-07	4.37	1.27e-05	0.0222242	RNF212	Heart_Atrial_Appendage
ENSG00000273179.1	4	1167777	1167778	0.0731	rs2242278	4.8	rs17164380	0.042	-4.29	4.70702	383	1	top1	0.042	4.1e-05	-4.71	2.51e-06	0.00886133	RP11-20I20.4	Heart_Atrial_Appendage
ENSG00000243056.1	5	140547665	140547666	0.1452	rs4279384	4.1	rs11168051	0.112161	6.81	3.96328	326	1	top1	0.11	2e-11	3.96328	7.39e-05	0.0464966	EIF4EBP3	Heart_Atrial_Appendage
ENSG00000213523.10	5	140558251	140558252	0.277	rs4279384	4.1	rs1862176	0.17073	-8.26	3.97144	327	1	top1	0.17	5.4e-17	-3.97144	7.14e-05	0.0456467	SRA1	Heart_Atrial_Appendage
ENSG00000107742.12	10	72089031	72089032	0.3328	rs4148946	-5.64	rs1245543	0.309179	10.98	3.75371	474	29	enet	0.31	1.9e-33	4.14306	3.43e-05	0.0328264	SPOCK2	Heart_Left_Ventricle
ENSG00000183032.11	14	36875003	36875004	0.1009	rs1950526	-5.11	rs10141058	0.032561	-4.19	-4.39713	535	1	top1	0.033	0.00022	4.39713	1.1e-05	0.019972	SLC25A21	Heart_Left_Ventricle
ENSG00000258708.1	14	37171887	37171888	0.1409	rs1950526	-5.11	rs7151497	0.043955	-6.25	-4.25988	467	467	susie	0.062	4.7e-07	4.32415	1.53e-05	0.0232709	SLC25A21-AS1	Heart_Left_Ventricle
ENSG00000151338.18	14	37197912	37197913	0.0948	rs1950526	-5.11	rs1955946	0.001536	-3.7	0.85415	448	448	susie	0.011	0.021	-4.14415	3.41e-05	0.0328264	MIPOL1	Heart_Left_Ventricle
ENSG00000260306.1	16	21795758	21795759	0.3891	rs161330	-5.86	rs4783414	0.0173	-7.05	-2.83053	137	137	susie	0.21	6e-22	4.49322	7.02e-06	0.0164008	RP11-645C24.5	Heart_Left_Ventricle
ENSG00000103485.17	16	29679007	29679008	0.1711	rs35042042	4.15	rs12447415	0.0841	-6.14	-3.78484	181	10	enet	0.1	1.1e-10	4.14261	3.43e-05	0.0328264	QPRT	Heart_Left_Ventricle
ENSG00000169599.12	2	69437627	69437628	0.0577	rs13429805	4.98	rs7422275	0.00149	3.79	4.20533	383	383	susie	0.031	0.00031	4.83721	1.32e-06	0.00665735	NFU1	Heart_Left_Ventricle
ENSG00000173421.16	3	49198427	49198428	0.2503	rs10865954	4.42	rs3774800	0.118239	-7.02	3.12391	259	16	enet	0.13	3.6e-13	-4.3137	1.61e-05	0.0236832	CCDC36	Heart_Left_Ventricle
ENSG00000225399.4	3	49260084	49260085	0.3847	rs10865954	4.42	rs3774800	0.074063	-5.69	3.12391	271	40	enet	0.098	1.8e-10	-4.0863	4.38e-05	0.0379207	RP11-3B7.1	Heart_Left_Ventricle
ENSG00000145029.13	3	49429325	49429326	0.0567	rs10865954	4.42	rs6778080	0.035078	-4.79	3.32428	288	15	enet	0.051	4.9e-06	-4.03799	5.39e-05	0.0410696	NICN1	Heart_Left_Ventricle
ENSG00000178222.12	4	1113561	1113562	0.1727	rs2242278	4.8	rs2127908	0.0493	-5.45	-4.29049	385	385	susie	0.1	4.3e-11	5.05239	4.36e-07	0.00477701	RNF212	Heart_Left_Ventricle
ENSG00000273179.1	4	1167777	1167778	0.1399	rs2242278	4.8	rs2242278	0.0295	-5.07	4.79582	383	1	top1	0.029	0.00041	-4.79582	1.62e-06	0.00735334	RP11-20I20.4	Heart_Left_Ventricle
ENSG00000213523.10	5	140558251	140558252	0.3567	rs4279384	4.1	rs4279384	0.284322	-10.74	4.10147	330	330	susie	0.33	4.4e-35	-4.0031	6.25e-05	0.0440323	SRA1	Heart_Left_Ventricle
ENSG00000139865.16	14	37595846	37595847	0.1091	rs1950526	-5.11	rs7493775	0.047595	4.31	-4.7893	317	1	top1	0.048	0.0009	-4.78931	1.67e-06	0.00747353	TTC6	Liver
ENSG00000157368.10	16	70579894	70579895	0.2455	rs7192865	4.19	rs1456954	0.041008	4.1	-2.99236	154	17	enet	0.085	1.1e-05	-4.28765	1.81e-05	0.024266	IL34	Liver
ENSG00000249637.1	5	140401366	140401367	0.1282	rs4279384	4.1	rs6860077	0.032617	-4.19	3.97313	311	311	susie	0.035	0.0039	-3.99065	6.59e-05	0.0450806	CTC-329D1.2	Liver
ENSG00000135318.11	6	85449583	85449584	0.1657	rs9362215	4.42	rs494688	0.128	-6.2	3.92368	431	431	susie	0.16	1.5e-09	-3.93588	8.29e-05	0.0496651	NT5E	Liver
ENSG00000107742.12	10	72089031	72089032	0.0555	rs4148946	-5.64	rs3312	0.0145	4.33	4.22072	474	1	top1	0.015	0.0036	4.22072	2.44e-05	0.0280155	SPOCK2	Lung
ENSG00000257803.2	12	100578800	100578801	0.0628	rs1045602	-3.97	rs35707	0.0242	4	-3.94735	444	1	top1	0.024	0.00023	-3.94735	7.9e-05	0.0481789	RP11-575G13.2	Lung
ENSG00000183032.11	14	36875003	36875004	0.0651	rs1950526	-5.11	rs7143938	0.029546	4.72	-4.27734	531	531	susie	0.03	5.2e-05	-4.47017	7.82e-06	0.0173755	SLC25A21	Lung
ENSG00000258708.1	14	37171887	37171888	0.0657	rs1950526	-5.11	rs8012018	0.029039	-5.72	-4.26001	465	465	susie	0.049	2.2e-07	4.38683	1.15e-05	0.020528	SLC25A21-AS1	Lung
ENSG00000259087.5	14	37567094	37567095	0.0389	rs1950526	-5.11	rs8005136	0.008217	4.01	-4.07404	301	12	enet	0.014	0.0041	-4.22888	2.35e-05	0.0277577	RP11-356O9.2	Lung
ENSG00000139865.16	14	37595846	37595847	0.0672	rs1950526	-5.11	rs1950826	0.062892	6.16	-4.85325	310	1	top1	0.063	4.8e-09	-4.85325	1.21e-06	0.00656309	TTC6	Lung
ENSG00000260306.1	16	21795758	21795759	0.3902	rs161330	-5.63	rs4783412	0.15503	-9.04	-2.56903	132	132	susie	0.26	2.9e-36	4.0723	4.66e-05	0.0388982	RP11-645C24.5	Lung
ENSG00000169203.16	16	29505998	29505999	0.0999	rs35042042	4.34	rs12716974	0.037768	-5.26	-3.66062	167	12	enet	0.053	7e-08	4.3361	1.45e-05	0.0232709	NPIPB12	Lung
ENSG00000102886.14	16	30113855	30113856	0.2198	rs35042042	4.47	rs11646118	0.039063	-6.06	3.27088	223	47	enet	0.1	4e-14	-3.9356	8.3e-05	0.0496651	GDPD3	Lung
ENSG00000102882.11	16	30123505	30123506	0.0714	rs35042042	4.47	rs7201780	0.023459	5.48	-3.53657	224	14	enet	0.024	0.00027	-4.0291	5.6e-05	0.0417682	MAPK3	Lung
ENSG00000141458.12	18	23586897	23586898	0.2257	rs2337024	-4.18	rs1429935	0.159833	9.8	-3.7901	361	361	susie	0.17	1.6e-22	-4.0674	4.75e-05	0.0388982	NPC1	Lung
ENSG00000101017.13	20	46118271	46118272	0.2465	rs12624433	3.84	rs6074022	0.181045	-9.77	3.6521	501	13	enet	0.19	9.5e-26	-3.95019	7.81e-05	0.0480286	CD40	Lung
ENSG00000091106.18	2	32265853	32265854	0.0532	rs212730	4	rs212730	0.0314	-5.8	4.00254	310	310	susie	0.051	1.2e-07	-4.01843	5.86e-05	0.042389	NLRC4	Lung
ENSG00000169599.12	2	69437627	69437628	0.0498	rs13429805	4.98	rs7578692	0.0275	4.29	4.82403	376	1	top1	0.027	9.2e-05	4.82403	1.41e-06	0.00678802	NFU1	Lung
ENSG00000144214.9	2	99304741	99304742	0.2063	rs12479064	4.36	rs7567462	0.0788	-8.1	-2.51973	312	33	enet	0.17	4.4e-23	4.24689	2.17e-05	0.0259206	LYG1	Lung
ENSG00000225399.4	3	49260084	49260085	0.3295	rs10865954	4.42	rs12493001	0.0966	-7.53	3.02326	271	36	enet	0.15	4.6e-20	-4.19958	2.67e-05	0.0295421	RP11-3B7.1	Lung
ENSG00000164068.15	3	49689501	49689502	0.1524	rs2029591	4.29	rs7634902	0.106	8.39	3.17748	316	316	susie	0.15	6.9e-20	4.02461	5.71e-05	0.0420946	RNF123	Lung
ENSG00000178222.12	4	1113561	1113562	0.1536	rs2242278	4.796	rs2127908	0.0753	-6.45	-4.29049	385	17	enet	0.12	4e-16	5.29489	1.19e-07	0.00252071	RNF212	Lung
ENSG00000273179.1	4	1167777	1167778	0.1866	rs2242278	4.796	rs11247975	0.0854	6.7	-4.32137	383	383	susie	0.086	6.5e-12	-4.86653	1.14e-06	0.00656309	RP11-20I20.4	Lung
ENSG00000087206.16	5	177022601	177022602	0.0832	rs353489	4.16	rs1700490	0.0584	5.61	4.05942	386	1	top1	0.058	1.7e-08	4.05942	4.92e-05	0.0389842	UIMC1	Lung
ENSG00000005020.12	7	26995238	26995239	0.1059	rs7799519	-4.83	rs1024453	0.042473	6.09	-4.42147	497	10	enet	0.068	1.1e-09	-4.34383	1.4e-05	0.0229748	SKAP2	Lung
ENSG00000004864.13	7	96322146	96322147	0.0629	rs7811725	4.92	rs12704844	0.046427	5.94	3.86339	425	425	susie	0.056	3.7e-08	4.0263	5.67e-05	0.0419946	SLC25A13	Lung
ENSG00000122863.5	10	71964364	71964365	0.3626	rs4148946	-5.64	rs4148949	0.082898	4.95	-5.61655	552	552	susie	0.096	9.5e-05	-5.68244	1.33e-08	0.00192407	CHST3	Minor_Salivary_Gland
ENSG00000258708.1	14	37171887	37171888	0.179	rs1950526	-5.11	rs2064545	0.0182	3.55	-0.08017	476	476	susie	0.019	0.054	4.62945	3.67e-06	0.0106009	SLC25A21-AS1	Minor_Salivary_Gland
ENSG00000029559.6	4	87799580	87799581	0.2198	rs2126650	4.32	rs2627690	-0.007034	3.4	3.6978	502	502	susie	0.026	0.03	3.98803	6.66e-05	0.04512	IBSP	Minor_Salivary_Gland
ENSG00000213523.10	5	140558251	140558252	0.0995	rs4279384	4.1	rs1835148	0.110627	-4.37	4.06773	327	1	top1	0.11	2.8e-05	-4.06773	4.75e-05	0.0388982	SRA1	Minor_Salivary_Gland
ENSG00000283602.1	5	140594569	140594570	0.1544	rs4279384	4.1	rs6860077	0.012724	3.8	3.97313	327	1	top1	0.013	0.094	3.97313	7.09e-05	0.0456467	AC011380.8	Minor_Salivary_Gland
ENSG00000227885.1	6	53747021	53747022	0.234	rs10948797	4.81	rs1883632	0.030774	-3.85	-3.45985	526	526	susie	0.088	0.00018	4.08815	4.35e-05	0.0377638	RP11-79N23.1	Minor_Salivary_Gland
ENSG00000165995.18	10	18140676	18140677	0.3041	rs11013700	-4.18	rs10458703	0.159359	10.72	-3.52776	518	42	enet	0.19	6.8e-35	-4.27871	1.88e-05	0.0246408	CACNB2	Muscle_Skeletal
ENSG00000107742.12	10	72089031	72089032	0.2103	rs4148946	-5.64	rs1245543	0.170816	11.06	3.75371	457	10	enet	0.17	4.9e-31	4.43166	9.35e-06	0.0189111	SPOCK2	Muscle_Skeletal
ENSG00000083642.18	13	32586426	32586427	0.0426	rs499966	4.57	rs7332115	0.012694	4.72	4.3018	475	475	susie	0.017	0.0003	4.30833	1.64e-05	0.0239032	PDS5B	Muscle_Skeletal
ENSG00000141458.12	18	23586897	23586898	0.1037	rs2337024	-4.18	rs1808579	0.078274	7.86	-3.9644	353	1	top1	0.078	2.2e-14	-3.9644	7.36e-05	0.0463997	NPC1	Muscle_Skeletal
ENSG00000179456.10	1	244048938	244048939	0.0717	rs10803191	4.85	rs10754818	0.0477	6.03	4.82576	440	1	top1	0.048	2.7e-09	4.82576	1.39e-06	0.00678802	ZBTB18	Muscle_Skeletal
ENSG00000278709.1	20	57710182	57710183	0.1232	rs2273534	3.44	rs2273534	0.134	9.78	3.442	618	618	susie	0.14	7.5e-25	4.00887	6.1e-05	0.0433601	NKILA	Muscle_Skeletal
ENSG00000198380.12	2	69387253	69387254	0.0788	rs6724567	4.97	rs7585658	0.0395	-6.39	-2.11412	377	11	enet	0.052	5.7e-10	4.01459	5.96e-05	0.0427943	GFPT1	Muscle_Skeletal
ENSG00000144214.9	2	99304741	99304742	0.0929	rs12479064	4.36	rs11899745	0.0534	7.29	3.4694	310	310	susie	0.067	1.6e-12	3.99467	6.48e-05	0.0447595	LYG1	Muscle_Skeletal
ENSG00000170837.2	3	71754049	71754050	0.0575	rs3796224	-3.9	rs2322142	0.0154	4.76	1.84435	552	13	enet	0.048	2.6e-09	4.41275	1.02e-05	0.0190642	GPR27	Muscle_Skeletal
ENSG00000174564.12	3	136957864	136957865	0.0307	rs13099657	3.75	rs1048145	-0.000596	-4	-3.32917	332	6	enet	-0.00011	0.34	4.03833	5.38e-05	0.0410696	IL20RB	Muscle_Skeletal
ENSG00000273179.1	4	1167777	1167778	0.0576	rs2242278	4.8	rs11247975	0.0296	5.07	-4.32137	383	383	susie	0.031	1.5e-06	-4.513	6.39e-06	0.0153814	RP11-20I20.4	Muscle_Skeletal
ENSG00000188981.10	4	3244368	3244369	0.1075	rs363066	-4.08	rs362273	0.0296	5.61	-4.01522	415	5	lasso	0.04	4.2e-08	-3.9656	7.32e-05	0.0463024	MSANTD1	Muscle_Skeletal
ENSG00000243056.1	5	140547665	140547666	0.1094	rs4279384	4.1	rs6871703	0.079	7.72	3.99675	326	326	susie	0.087	7.1e-16	4.20885	2.57e-05	0.0288546	EIF4EBP3	Muscle_Skeletal
ENSG00000131507.10	5	142108504	142108505	0.2957	rs10061008	4.02	rs12653848	0.265	-13.75	-3.4304	578	35	enet	0.29	3.9e-55	4.05013	5.12e-05	0.0394671	NDFIP1	Muscle_Skeletal
ENSG00000065609.14	6	83709690	83709691	0.1685	rs12193281	4.06	rs660956	0.036527	5.64	2.71737	281	29	enet	0.042	2e-08	4.47429	7.67e-06	0.0171623	SNAP91	Muscle_Skeletal
ENSG00000004864.13	7	96322146	96322147	0.0371	rs7811725	4.92	rs35974282	0.0123	4.08	4.06187	421	1	top1	0.012	0.0018	4.06187	4.87e-05	0.0389842	SLC25A13	Muscle_Skeletal
ENSG00000107742.12	10	72089031	72089032	0.0626	rs4148946	-5.64	rs3312	0.031057	4.42	4.22072	465	1	top1	0.031	2.6e-05	4.22072	2.44e-05	0.0280155	SPOCK2	Nerve_Tibial
ENSG00000111325.16	12	122974682	122974683	0.0288	rs1707730	5.06	rs1790121	0.0013	3.56	-3.63782	318	12	enet	0.021	0.00053	-4.7205	2.35e-06	0.00886133	OGFOD2	Nerve_Tibial
ENSG00000281026.1	13	32509394	32509395	0.1136	rs499966	4.62	rs11840502	0.106751	-7.99	4.25	463	463	susie	0.11	1.1e-15	-4.31295	1.61e-05	0.0236832	N4BP2L2-IT2	Nerve_Tibial
ENSG00000083642.18	13	32586426	32586427	0.0537	rs499966	4.56	rs7332115	0.03233	4.85	4.3	485	1	top1	0.032	1.8e-05	4.30178	1.69e-05	0.0240796	PDS5B	Nerve_Tibial
ENSG00000151338.18	14	37197912	37197913	0.0783	rs1950526	-5.11	rs6571812	0.040129	5.05	-5.01872	447	1	top1	0.04	1.9e-06	-5.01872	5.2e-07	0.00481494	MIPOL1	Nerve_Tibial
ENSG00000260306.1	16	21795758	21795759	0.5635	rs161330	-5.86	rs4783412	0.166	-9.54	-2.56903	131	131	susie	0.37	3.9e-55	4.02314	5.74e-05	0.0420965	RP11-645C24.5	Nerve_Tibial
ENSG00000167371.17	16	29811985	29811986	0.0395	rs35042042	4.06	rs4609871	0.0116	4.36	-3.59514	155	13	enet	0.023	0.0003	-4.19053	2.78e-05	0.0295421	PRRT2	Nerve_Tibial
ENSG00000141458.12	18	23586897	23586898	0.2508	rs2337024	-4.18	rs1652376	0.248794	11.59	-3.9338	361	6	lasso	0.27	5.6e-39	-4.0637	4.83e-05	0.0389842	NPC1	Nerve_Tibial
ENSG00000101246.19	20	63708024	63708025	0.0575	rs16983844	-3.49	rs6062484	0.000474	-3.82	-3.3773	424	424	susie	0.0019	0.15	4.03376	5.49e-05	0.0415096	ARFRP1	Nerve_Tibial
ENSG00000169599.12	2	69437627	69437628	0.0493	rs13429805	4.98	rs6724567	0.0299	4.74	4.96964	377	1	top1	0.03	3.6e-05	4.96964	6.71e-07	0.00533004	NFU1	Nerve_Tibial
ENSG00000185414.19	2	99181078	99181079	0.0768	rs1563108	4.25	rs10181422	0.0309	-4.61	4.18406	303	1	top1	0.031	2.7e-05	-4.18406	2.86e-05	0.029991	MRPL30	Nerve_Tibial
ENSG00000144214.9	2	99304741	99304742	0.1758	rs12479064	4.36	rs6715321	0.188	10.2	3.581	312	21	enet	0.2	5.1e-28	4.47544	7.63e-06	0.0171623	LYG1	Nerve_Tibial
ENSG00000185909.14	3	49171610	49171611	0.0707	rs10865954	4.42	rs10865954	0.067631	6.15	4.41975	262	1	top1	0.068	6.8e-10	4.41975	9.88e-06	0.0189111	KLHDC8B	Nerve_Tibial
ENSG00000067560.10	3	49412201	49412202	0.0292	rs10865954	4.42	rs4241405	0.031257	4.47	4.28768	288	1	top1	0.031	2.4e-05	4.28768	1.81e-05	0.024266	RHOA	Nerve_Tibial
ENSG00000187492.8	3	49799834	49799835	0.0184	rs2029591	4.29	rs4855882	0.000752	3.58	3.75649	311	5	lasso	0.01	0.012	4.05182	5.08e-05	0.0393684	CDHR4	Nerve_Tibial
ENSG00000174564.12	3	136957864	136957865	0.7769	rs13099657	3.75	rs1048145	0.334847	-13.64	-3.32917	332	49	enet	0.5	8.3e-83	4.16268	3.15e-05	0.0315732	IL20RB	Nerve_Tibial
ENSG00000178222.12	4	1113561	1113562	0.2895	rs2242278	4.8	rs2127908	0.08205	-6.92	-4.29049	384	384	susie	0.11	7.7e-16	4.66796	3.04e-06	0.00991339	RNF212	Nerve_Tibial
ENSG00000273179.1	4	1167777	1167778	0.1621	rs2242278	4.8	rs11247975	0.120321	8.34	-4.32137	383	12	enet	0.14	5.1e-19	-5.3599	8.33e-08	0.00229565	RP11-20I20.4	Nerve_Tibial
ENSG00000159674.11	4	1208961	1208962	0.0519	rs2242278	4.8	rs1250126	0.030202	-4.86	4.63568	386	386	susie	0.031	2.7e-05	-4.77406	1.81e-06	0.00777168	SPON2	Nerve_Tibial
ENSG00000029559.6	4	87799580	87799581	0.1069	rs2126650	4.32	rs12650760	0.054079	-6.26	-3.6053	499	18	enet	0.075	7e-11	5.0567	4.27e-07	0.00477701	IBSP	Nerve_Tibial
ENSG00000243056.1	5	140547665	140547666	0.0684	rs4279384	4.1	rs250429	0.0415	4.95	4.0627	328	1	top1	0.041	1.3e-06	4.06273	4.85e-05	0.0389842	EIF4EBP3	Nerve_Tibial
ENSG00000213523.10	5	140558251	140558252	0.1324	rs4279384	4.1	rs250429	0.128	-8.58	4.0627	329	1	top1	0.13	1.1e-17	-4.06273	4.85e-05	0.0389842	SRA1	Nerve_Tibial
ENSG00000087206.16	5	177022601	177022602	0.0469	rs353489	4.16	rs1700490	0.0443	5.04	4.0594	379	1	lasso	0.045	5.4e-07	4.05942	4.92e-05	0.0389842	UIMC1	Nerve_Tibial
ENSG00000107742.12	10	72089031	72089032	0.3576	rs4148946	-5.64	rs1678627	0.269	-6.82	4.16484	487	1	top1	0.27	4.3e-13	-4.1648	3.12e-05	0.0314711	SPOCK2	Ovary
ENSG00000281026.1	13	32509394	32509395	0.15	rs499966	4.62	rs499966	0.035237	-4.09	4.61804	480	1	top1	0.035	0.0086	-4.62	3.87e-06	0.0108818	N4BP2L2-IT2	Ovary
ENSG00000183032.11	14	36875003	36875004	0.1676	rs1950526	-5.11	rs7151191	0.019128	4.03	-4.8353	544	544	susie	0.024	0.025	-4.86277	1.16e-06	0.00656309	SLC25A21	Ovary
ENSG00000260306.1	16	21795758	21795759	0.6045	rs161330	-5.86	rs4783412	0.165	-5.43	-2.56903	137	9	lasso	0.27	2.7e-13	4.0145	5.96e-05	0.0427943	RP11-645C24.5	Ovary
ENSG00000103051.18	16	70523564	70523565	0.4412	rs7192865	4.19	rs7192865	0.125	-4.79	4.19081	156	1	top1	0.12	1.7e-06	-4.1908	2.78e-05	0.0295421	COG4	Ovary
ENSG00000144214.9	2	99304741	99304742	0.2862	rs12479064	4.36	rs1955393	0.08778	5.29	2.93415	312	27	enet	0.13	9.2e-07	4.28579	1.82e-05	0.0242975	LYG1	Ovary
ENSG00000273179.1	4	1167777	1167778	0.2222	rs2242278	4.8	rs2127908	0.04027	3.93	-4.29049	384	1	top1	0.04	0.0054	-4.29049	1.78e-05	0.0241697	RP11-20I20.4	Ovary
ENSG00000234155.1	6	85390185	85390186	0.2273	rs9344525	4.28	rs9359655	0.19778	6.23	4.2365	443	443	susie	0.21	3.7e-10	4.25381	2.1e-05	0.0256634	RP11-30P6.6	Ovary
ENSG00000128594.7	7	128032106	128032107	0.164	rs3808087	5.31	rs17716738	0.0149	-4.48	4.4809	392	6	lasso	0.066	0.00048	-4.44539	8.77e-06	0.018577	LRRC4	Ovary
ENSG00000280303.2	8	140636280	140636281	0.1531	rs2944776	-5.6	rs6987810	-0.000764	3.41	-3.64782	369	369	susie	0.045	0.0034	-4.07517	4.6e-05	0.0388721	ERICD	Ovary
ENSG00000122863.5	10	71964364	71964365	0.1386	rs4148946	-5.64	rs731027	0.0506	-5.08	5.13068	549	549	susie	0.07	1.6e-06	-5.1869	2.14e-07	0.00424973	CHST3	Pancreas
ENSG00000107742.12	10	72089031	72089032	0.1343	rs4148946	-5.64	rs3312	0.07	4.74	4.22072	476	1	top1	0.07	1.7e-06	4.22072	2.44e-05	0.0280155	SPOCK2	Pancreas
ENSG00000151498.11	11	134253494	134253495	0.2094	rs597320	-3.67	rs1259022	0.00379	-3.98	-3.5245	583	583	susie	0.027	0.0024	4.7182	2.38e-06	0.00886133	ACAD8	Pancreas
ENSG00000281026.1	13	32509394	32509395	0.0651	rs499966	4.62	rs9595908	0.065597	-4.99	4.32535	474	1	top1	0.066	3.5e-06	-4.32535	1.52e-05	0.0232709	N4BP2L2-IT2	Pancreas
ENSG00000183032.11	14	36875003	36875004	0.4263	rs1950526	-5.11	rs7151191	0.208351	-8.65	-4.83532	537	537	susie	0.22	1.1e-18	4.86633	1.14e-06	0.00656309	SLC25A21	Pancreas
ENSG00000258708.1	14	37171887	37171888	0.4966	rs1950526	-5.11	rs7151191	0.27685	-10.17	-4.83532	468	468	susie	0.4	3.2e-35	4.85767	1.19e-06	0.00656309	SLC25A21-AS1	Pancreas
ENSG00000151338.18	14	37197912	37197913	0.5648	rs1950526	-5.11	rs12893503	0.168509	-8.99	-5.00436	449	39	enet	0.31	6.9e-27	4.51946	6.2e-06	0.0152711	MIPOL1	Pancreas
ENSG00000258414.1	14	37564046	37564047	0.1038	rs1950526	-5.11	rs8008655	0.016697	-4.64	-4.6936	294	294	susie	0.035	0.00064	5.01401	5.33e-07	0.00481494	RP11-356O9.1	Pancreas
ENSG00000141458.12	18	23586897	23586898	0.3473	rs2337024	-4.18	rs2510344	0.13823	7.56	-3.8144	365	24	enet	0.2	1.9e-16	-4.09348	4.25e-05	0.0374067	NPC1	Pancreas
ENSG00000196109.6	19	22196950	22196951	0.1747	rs2204581	-3.31	rs1988038	0.019	5.39	-3.15519	331	331	susie	0.073	9.7e-07	-4.09524	4.22e-05	0.0372458	ZNF676	Pancreas
ENSG00000169599.12	2	69437627	69437628	0.0625	rs13429805	4.98	rs13419122	0.000638	4.01	4.8282	382	3	lasso	0.046	9.8e-05	4.85238	1.22e-06	0.00656309	NFU1	Pancreas
ENSG00000185414.19	2	99181078	99181079	0.1015	rs1563108	4.25	rs1563108	0.073296	-4.9	4.25461	303	1	top1	0.073	9.5e-07	-4.25461	2.09e-05	0.0256634	MRPL30	Pancreas
ENSG00000214820.3	3	44581025	44581026	0.0513	rs7616538	4.3	rs1915084	-0.00241	3.25	-1.12199	315	315	susie	0.0038	0.14	-4.26052	2.04e-05	0.0256199	MPRIPP1	Pancreas
ENSG00000111325.16	12	122974682	122974683	0.0922	rs1707730	5.06	rs1879380	-0.00265	3.28	-3.62962	319	319	susie	-0.0023	0.49	-4.35476	1.33e-05	0.0222416	OGFOD2	Pituitary
ENSG00000260306.1	16	21795758	21795759	0.657	rs161330	-5.86	rs4783412	0.216692	-7.95	-2.56903	137	137	susie	0.47	1.2e-34	4.22336	2.41e-05	0.0280155	RP11-645C24.5	Pituitary
ENSG00000183011.13	17	7885237	7885238	0.2228	rs17807204	3.95	rs3744251	0.164	6.3	3.92989	508	6	lasso	0.16	5.1e-11	4.05727	4.97e-05	0.0389914	NAA38	Pituitary
ENSG00000141458.12	18	23586897	23586898	0.1206	rs2337024	-4.18	rs1652376	0.014077	3.79	-3.9338	363	1	top1	0.014	0.038	-3.9338	8.36e-05	0.0497431	NPC1	Pituitary
ENSG00000169599.12	2	69437627	69437628	0.1547	rs13429805	4.98	rs5017686	0.125009	5.9	4.85768	391	1	top1	0.13	1.3e-08	4.85768	1.19e-06	0.00656309	NFU1	Pituitary
ENSG00000144214.9	2	99304741	99304742	0.3406	rs12479064	4.36	rs11899745	0.067658	6.52	3.4694	312	11	lasso	0.19	1.3e-12	4.14518	3.4e-05	0.0328264	LYG1	Pituitary
ENSG00000243056.1	5	140547665	140547666	0.0797	rs4279384	4.1	rs1019933	0.0203	3.93	3.95024	329	329	susie	0.032	0.0033	4.0188	5.85e-05	0.042389	EIF4EBP3	Pituitary
ENSG00000213523.10	5	140558251	140558252	0.0928	rs4279384	4.1	rs4279384	0.0706	-4.86	4.10147	330	1	top1	0.071	2e-05	-4.10147	4.11e-05	0.0368468	SRA1	Pituitary
ENSG00000283602.1	5	140594569	140594570	0.1742	rs4279384	4.1	rs6860077	0.135	6.6	3.97313	330	330	susie	0.17	2.2e-11	3.95316	7.71e-05	0.0476914	AC011380.8	Pituitary
ENSG00000122863.5	10	71964364	71964365	0.1626	rs4148946	-5.64	rs1245531	0.115	5.35	4.9269	561	3	lasso	0.12	6.7e-08	5.0439	4.56e-07	0.00481494	CHST3	Prostate
ENSG00000281026.1	13	32509394	32509395	0.0871	rs499966	4.62	rs11840502	0.009007	-3.72	4.25442	475	3	lasso	0.016	0.035	-4.32052	1.56e-05	0.0232709	N4BP2L2-IT2	Prostate
ENSG00000258708.1	14	37171887	37171888	0.1121	rs1950526	-5.11	rs35322850	0.040459	-4.19	-4.6229	468	1	top1	0.04	0.0015	4.6229	3.78e-06	0.0108202	SLC25A21-AS1	Prostate
ENSG00000259087.5	14	37567094	37567095	0.1258	rs1950526	-5.11	rs6571814	0.117357	5.5	-4.7752	305	1	top1	0.12	1.1e-07	-4.7752	1.79e-06	0.00777168	RP11-356O9.2	Prostate
ENSG00000102886.14	16	30113855	30113856	0.1274	rs35042042	4.47	rs8061772	0.106448	-5.03	3.0725	223	223	susie	0.14	4e-09	-4.09514	4.22e-05	0.0372458	GDPD3	Prostate
ENSG00000141452.9	18	23503469	23503470	0.0904	rs2337024	-4.09	rs1808579	0.054229	4.2	-3.9374	348	3	lasso	0.057	0.0002	-3.96778	7.25e-05	0.0460719	C18orf8	Prostate
ENSG00000144214.9	2	99304741	99304742	0.2165	rs12479064	4.36	rs4851196	0.028822	5.09	3.74648	312	312	susie	0.088	4.6e-06	4.45789	8.28e-06	0.017897	LYG1	Prostate
ENSG00000186448.14	3	44584887	44584888	0.1334	rs7616538	4.32	rs725866	0.014735	-4.68	4.19842	319	319	susie	0.044	0.001	-4.23695	2.27e-05	0.0270136	ZNF197	Prostate
ENSG00000178222.12	4	1113561	1113562	0.2962	rs2242278	4.8	rs11726675	0.014577	-3.77	-2.53144	384	7	lasso	0.044	0.00096	5.4424	5.26e-08	0.00192407	RNF212	Prostate
ENSG00000273179.1	4	1167777	1167778	0.1045	rs2242278	4.8	rs17164380	0.074	-4.29	4.70702	383	1	top1	0.074	2.5e-05	-4.707	2.51e-06	0.00886133	RP11-20I20.4	Prostate
ENSG00000107742.12	10	72089031	72089032	0.0726	rs4148946	-5.64	rs10762498	0.0237	-3.92	-5.40649	467	1	top1	0.024	0.00026	5.40649	6.43e-08	0.00204305	SPOCK2	Skin_Not_Sun_Exposed_Suprapubic
ENSG00000150977.10	12	123436716	123436717	0.1267	rs28466887	4.92	rs1707730	0.0887	6.95	4.85039	364	364	susie	0.092	1e-12	4.73733	2.17e-06	0.00867964	RILPL2	Skin_Not_Sun_Exposed_Suprapubic
ENSG00000281026.1	13	32509394	32509395	0.041	rs499966	4.62	rs11840502	0.0226	-4.31	4.25442	464	1	top1	0.023	0.00036	-4.25442	2.1e-05	0.0256634	N4BP2L2-IT2	Skin_Not_Sun_Exposed_Suprapubic
ENSG00000083642.18	13	32586426	32586427	0.039	rs499966	4.56	rs3742320	0.0272	4.59	4.35525	486	1	top1	0.027	9.8e-05	4.35525	1.33e-05	0.0222416	PDS5B	Skin_Not_Sun_Exposed_Suprapubic
ENSG00000183032.11	14	36875003	36875004	0.0557	rs1950526	-5.11	rs35322850	0.021109	4.49	-4.64251	530	1	top1	0.021	0.00054	-4.64251	3.44e-06	0.0106009	SLC25A21	Skin_Not_Sun_Exposed_Suprapubic
ENSG00000258708.1	14	37171887	37171888	0.0501	rs1950526	-5.11	rs8012018	0.033837	-5.46	-4.26021	461	461	susie	0.038	4.4e-06	4.35903	1.31e-05	0.0222416	SLC25A21-AS1	Skin_Not_Sun_Exposed_Suprapubic
ENSG00000183336.8	16	29454963	29454964	0.1018	rs35042042	4.37	rs12716974	0.0181	4.07	-3.66062	160	20	enet	0.039	4e-06	-4.02837	5.62e-05	0.0417958	BOLA2	Skin_Not_Sun_Exposed_Suprapubic
ENSG00000169599.12	2	69437627	69437628	0.0798	rs13429805	4.98	rs5013338	0.0629	6.23	4.81755	375	18	enet	0.075	1.4e-10	4.63584	3.55e-06	0.0106009	NFU1	Skin_Not_Sun_Exposed_Suprapubic
ENSG00000144214.9	2	99304741	99304742	0.1372	rs12479064	4.36	rs4851203	0.115	7.79	4.03375	312	20	enet	0.14	4.9e-19	4.05212	5.08e-05	0.0393684	LYG1	Skin_Not_Sun_Exposed_Suprapubic
ENSG00000163807.5	3	44761661	44761662	0.2052	rs3804580	4.29	rs954282	0.27	11.93	4.04948	386	1	top1	0.27	2.4e-37	4.04948	5.13e-05	0.0394671	KIAA1143	Skin_Not_Sun_Exposed_Suprapubic
ENSG00000164068.15	3	49689501	49689502	0.1031	rs2029591	4.29	rs1996664	0.0648	6.46	3.76799	316	12	enet	0.083	1.6e-11	4.0689	4.72e-05	0.0388982	RNF123	Skin_Not_Sun_Exposed_Suprapubic
ENSG00000176095.11	3	49786541	49786542	0.0282	rs2029591	4.29	rs1491983	0.0132	4.1	4.28777	321	321	susie	0.016	0.0022	3.9374	8.24e-05	0.0495526	IP6K1	Skin_Not_Sun_Exposed_Suprapubic
ENSG00000273179.1	4	1167777	1167778	0.213	rs2242278	4.8	rs11247975	0.111666	7.73	-4.32137	383	1	top1	0.11	3.6e-15	-4.32137	1.55e-05	0.0232709	RP11-20I20.4	Skin_Not_Sun_Exposed_Suprapubic
ENSG00000243056.1	5	140547665	140547666	0.0582	rs4279384	4.1	rs1862176	0.0308	5.06	3.97144	327	327	susie	0.038	4.7e-06	3.98929	6.63e-05	0.0450806	EIF4EBP3	Skin_Not_Sun_Exposed_Suprapubic
ENSG00000283602.1	5	140594569	140594570	0.0758	rs4279384	4.1	rs4279384	0.0624	6.2	4.10147	328	6	enet	0.068	9.8e-10	4.26193	2.03e-05	0.0256199	AC011380.8	Skin_Not_Sun_Exposed_Suprapubic
ENSG00000087206.16	5	177022601	177022602	0.1193	rs353489	4.15	rs1700490	0.0932	7.19	4.05942	378	1	top1	0.093	7.7e-13	4.05942	4.92e-05	0.0389842	UIMC1	Skin_Not_Sun_Exposed_Suprapubic
ENSG00000135318.11	6	85449583	85449584	0.0597	rs9362215	4.42	rs6942065	0.0445	5.34	4.10095	430	1	top1	0.044	7.8e-07	4.10095	4.11e-05	0.0368468	NT5E	Skin_Not_Sun_Exposed_Suprapubic
ENSG00000167157.10	9	129665640	129665641	0.1647	rs7032080	-3.49	rs894417	0.029328	5.1	-2.94341	474	5	lasso	0.066	2.1e-09	-3.9772	6.97e-05	0.0456467	PRRX2	Skin_Not_Sun_Exposed_Suprapubic
ENSG00000183032.11	14	36875003	36875004	0.0786	rs1950526	-5.11	rs1950526	0.029942	5.31	-5.1137	530	20	enet	0.035	2.2e-06	-4.42341	9.72e-06	0.0189111	SLC25A21	Skin_Sun_Exposed_Lower_leg
ENSG00000258708.1	14	37171887	37171888	0.0647	rs1950526	-5.11	rs8012018	0.038471	-6.12	-4.2602	461	4	lasso	0.055	2.7e-09	3.94957	7.83e-05	0.0480286	SLC25A21-AS1	Skin_Sun_Exposed_Lower_leg
ENSG00000260306.1	16	21795758	21795759	0.4476	rs161330	-5.83	rs4783412	0.096157	-8.3	-2.569	129	129	susie	0.25	1.4e-39	3.95948	7.51e-05	0.0471582	RP11-645C24.5	Skin_Sun_Exposed_Lower_leg
ENSG00000254634.4	16	29447025	29447026	0.0522	rs35042042	4.37	rs4609871	0.003876	3.48	-3.5951	156	9	enet	0.015	0.0017	-5.16141	2.45e-07	0.00432475	SMG1P6	Skin_Sun_Exposed_Lower_leg
ENSG00000183336.8	16	29454963	29454964	0.053	rs35042042	4.37	rs4609871	0.023238	4.33	-3.5951	156	18	enet	0.034	2.5e-06	-4.3159	1.59e-05	0.0236076	BOLA2	Skin_Sun_Exposed_Lower_leg
ENSG00000169203.16	16	29505998	29505999	0.1408	rs35042042	4.34	rs10083738	0.03542	-5.72	-3.4734	167	25	enet	0.061	3.7e-10	4.01364	5.98e-05	0.0427943	NPIPB12	Skin_Sun_Exposed_Lower_leg
ENSG00000132510.10	17	7839903	7839904	0.143	rs17807204	3.95	rs11078711	0.0837	-7.49	3.92537	508	508	susie	0.086	1.1e-13	-3.95435	7.67e-05	0.0476606	KDM6B	Skin_Sun_Exposed_Lower_leg
ENSG00000277972.1	17	38730234	38730235	0.2118	rs228269	-3.29	rs7224608	0.0783	7.93	-2.72946	335	36	enet	0.12	5.1e-18	-4.20234	2.64e-05	0.0293296	CISD3	Skin_Sun_Exposed_Lower_leg
ENSG00000041353.9	18	54717859	54717860	0.0641	rs2871673	-4.31	rs12959833	0.0503	5.97	-4.2245	358	1	top1	0.05	1.5e-08	-4.2245	2.39e-05	0.0280155	RAB27B	Skin_Sun_Exposed_Lower_leg
ENSG00000169599.12	2	69437627	69437628	0.0389	rs4428054	4.98	rs7592828	0.0274	5.01	4.81181	369	369	susie	0.032	6.3e-06	4.88	1.08e-06	0.00656309	NFU1	Skin_Sun_Exposed_Lower_leg
ENSG00000183671.12	2	206218046	206218047	0.2045	rs17288678	-5.04	rs16838070	0.0232	5.85	-3.48214	426	25	enet	0.073	8.6e-12	-4.43	9.29e-06	0.0189111	GPR1	Skin_Sun_Exposed_Lower_leg
ENSG00000174564.12	3	136957864	136957865	0.3055	rs13099657	3.75	rs1682338	0.164	10.13	2.90991	333	333	susie	0.23	1.4e-35	4.23025	2.33e-05	0.0276241	IL20RB	Skin_Sun_Exposed_Lower_leg
ENSG00000273179.1	4	1167777	1167778	0.1979	rs2242278	4.8	rs11247975	0.0849	7.32	-4.32137	383	23	enet	0.091	2.2e-14	-5.47216	4.45e-08	0.00192407	RP11-20I20.4	Skin_Sun_Exposed_Lower_leg
ENSG00000243056.1	5	140547665	140547666	0.0528	rs4279384	4.1	rs12517200	0.0179	4.4	2.77616	327	6	enet	0.02	0.00029	3.9715	7.14e-05	0.0456467	EIF4EBP3	Skin_Sun_Exposed_Lower_leg
ENSG00000087206.16	5	177022601	177022602	0.1492	rs353489	4.11	rs1700490	0.155	9.76	4.05942	365	9	lasso	0.16	2e-24	3.94207	8.08e-05	0.0488083	UIMC1	Skin_Sun_Exposed_Lower_leg
ENSG00000197576.13	7	27130798	27130799	0.0631	rs7799519	-4.83	rs2465276	0.0102	4.07	-2.86338	388	19	enet	0.034	2.5e-06	-4.21386	2.51e-05	0.0283815	HOXA4	Skin_Sun_Exposed_Lower_leg
ENSG00000122863.5	10	71964364	71964365	0.3031	rs4148946	-5.64	rs1245531	0.135047	5.39	4.9209	563	1	top1	0.14	3.6e-07	4.92092	8.61e-07	0.00621754	CHST3	Small_Intestine_Terminal_Ileum
ENSG00000103051.18	16	70523564	70523565	0.2484	rs7192865	4.19	rs7192865	0.010909	-3.97	4.1908	160	1	top1	0.011	0.09	-4.1908	2.78e-05	0.0295421	COG4	Small_Intestine_Terminal_Ileum
ENSG00000169599.12	2	69437627	69437628	0.1657	rs13429805	4.98	rs7565783	-0.00578	3.06	4.44045	395	395	susie	0.018	0.044	5.43589	5.45e-08	0.00192407	NFU1	Small_Intestine_Terminal_Ileum
ENSG00000144214.9	2	99304741	99304742	0.3639	rs12479064	4.36	rs1955393	0.3	7.32	2.93415	312	18	enet	0.36	2.3e-18	4.00659	6.16e-05	0.0435915	LYG1	Small_Intestine_Terminal_Ileum
ENSG00000178222.12	4	1113561	1113562	0.2107	rs2242278	4.8	rs2127908	0.035134	-3.78	-4.29049	375	1	top1	0.035	0.0076	4.2905	1.78e-05	0.0241697	RNF212	Small_Intestine_Terminal_Ileum
ENSG00000273179.1	4	1167777	1167778	0.1956	rs2242278	4.8	rs2127908	0.119185	4.91	-4.29049	374	11	enet	0.12	1.3e-06	-4.7166	2.4e-06	0.00886133	RP11-20I20.4	Small_Intestine_Terminal_Ileum
ENSG00000213523.10	5	140558251	140558252	0.2958	rs4279384	4.1	rs6860077	0.206	-6.26	3.97313	328	1	top1	0.21	1.8e-10	-3.97313	7.09e-05	0.0456467	SRA1	Small_Intestine_Terminal_Ileum
ENSG00000260306.1	16	21795758	21795759	0.6684	rs161330	-5.86	rs4783412	0.0976	-5.63	-2.569	137	137	susie	0.32	6e-21	4.10807	3.99e-05	0.0364168	RP11-645C24.5	Spleen
ENSG00000198380.12	2	69387253	69387254	0.1888	rs6724567	4.97	rs13751	0.070888	5.35	4.92457	409	409	susie	0.15	1.1e-09	4.73005	2.24e-06	0.00867964	GFPT1	Spleen
ENSG00000169599.12	2	69437627	69437628	0.0866	rs13429805	4.98	rs12151791	0.048728	4.12	4.11709	390	1	top1	0.049	0.00048	4.11709	3.84e-05	0.0355607	NFU1	Spleen
ENSG00000214820.3	3	44581025	44581026	0.0839	rs7616538	4.3	rs954282	0.027093	-3.81	4.04948	313	1	top1	0.027	0.0074	-4.04948	5.13e-05	0.0394671	MPRIPP1	Spleen
ENSG00000163807.5	3	44761661	44761662	0.1587	rs3804580	4.29	rs2279908	0.033839	4.55	3.82438	383	383	susie	0.058	0.00015	4.03413	5.48e-05	0.0415096	KIAA1143	Spleen
ENSG00000145029.13	3	49429325	49429326	0.0623	rs10865954	4.42	rs1352889	0.002772	-3.26	3.75615	288	288	susie	0.013	0.048	-4.19516	2.73e-05	0.0295421	NICN1	Spleen
ENSG00000273179.1	4	1167777	1167778	0.444	rs2242278	4.8	rs11247975	0.225701	7.21	-4.32137	382	1	top1	0.23	2.1e-14	-4.32137	1.55e-05	0.0232709	RP11-20I20.4	Spleen
ENSG00000159674.11	4	1208961	1208962	0.2104	rs2242278	4.8	rs2127908	0.048448	4.69	-4.29049	385	385	susie	0.071	2.8e-05	-4.5133	6.38e-06	0.0153814	SPON2	Spleen
ENSG00000188981.10	4	3244368	3244369	0.0894	rs363066	-4.08	rs6855981	-0.002909	-3.68	-3.70088	411	411	susie	0.024	0.012	4.2505	2.13e-05	0.0257331	MSANTD1	Spleen
ENSG00000213523.10	5	140558251	140558252	0.2702	rs4279384	4.1	rs6871703	0.116626	-5.62	3.99913	328	1	top1	0.12	7.9e-08	-3.99913	6.36e-05	0.0443159	SRA1	Spleen
ENSG00000087206.16	5	177022601	177022602	0.1316	rs353489	4.16	rs353493	0.081918	4.64	4.11081	388	1	top1	0.082	7e-06	4.11081	3.94e-05	0.0361816	UIMC1	Spleen
ENSG00000005020.12	7	26995238	26995239	0.2091	rs7799519	-4.83	rs10227898	0.146889	6.95	-2.68951	499	15	enet	0.2	4.4e-13	-3.9708	7.16e-05	0.0456827	SKAP2	Spleen
ENSG00000185585.19	9	124777157	124777158	0.2281	rs16927537	4.98	rs10760376	0.204418	-7.06	3.97259	297	1	top1	0.2	4.7e-13	-3.97259	7.11e-05	0.0456467	OLFML2A	Spleen
ENSG00000258708.1	14	37171887	37171888	0.1009	rs1950526	-5.11	rs7153180	0.053216	-5.02	-4.12945	467	1	top1	0.053	1.6e-05	4.12945	3.64e-05	0.0340165	SLC25A21-AS1	Stomach
ENSG00000259087.5	14	37567094	37567095	0.1418	rs1950526	-5.11	rs1884798	0.108983	6.43	-5.01305	302	302	susie	0.12	5.7e-11	-4.99399	5.91e-07	0.00481494	RP11-356O9.2	Stomach
ENSG00000233509.2	3	44624796	44624797	0.048	rs3804580	4.29	rs4682765	0.005554	3.47	-2.52084	339	339	susie	0.0072	0.068	-4.27171	1.94e-05	0.0249559	ZNF197-AS1	Stomach
ENSG00000178222.12	4	1113561	1113562	0.1411	rs2242278	4.8	rs3775110	0.000273	-3.72	-2.82161	385	5	lasso	0.0077	0.062	4.83994	1.3e-06	0.00665735	RNF212	Stomach
ENSG00000273179.1	4	1167777	1167778	0.2141	rs2242278	4.8	rs11247975	0.058174	5.67	-4.32137	384	13	enet	0.068	1.1e-06	-5.05976	4.2e-07	0.00477701	RP11-20I20.4	Stomach
ENSG00000135318.11	6	85449583	85449584	0.1881	rs9362215	4.42	rs9294335	0.144621	-7.41	4.16917	432	432	susie	0.15	3e-13	-4.16816	3.07e-05	0.0314662	NT5E	Stomach
ENSG00000122863.5	10	71964364	71964365	0.2062	rs4148946	-5.64	rs4148947	0.168189	-8.05	4.85132	550	550	susie	0.2	3.5e-17	-5.055	4.3e-07	0.00477701	CHST3	Testis
ENSG00000138303.17	10	72217133	72217134	0.1543	rs4148946	-5.64	rs3312	0.157488	-7.17	4.22072	414	1	top1	0.16	8.2e-14	-4.2207	2.44e-05	0.0280155	ASCC1	Testis
ENSG00000111328.6	12	123272333	123272334	0.1893	rs28466887	4.84	rs1609520	0.139	-6.99	-3.65938	341	29	enet	0.14	1.2e-12	3.95503	7.65e-05	0.0476606	CDK2AP1	Testis
ENSG00000229800.1	13	32477273	32477274	0.07	rs499966	4.62	rs1088550	-0.00246	4	-3.79271	453	11	enet	0.011	0.032	-4.53203	5.84e-06	0.014761	ATP8A2P2	Testis
ENSG00000281026.1	13	32509394	32509395	0.1214	rs499966	4.62	rs9595795	0.0847	-5.8	4.47747	471	1	top1	0.085	6.2e-08	-4.47747	7.55e-06	0.0171351	N4BP2L2-IT2	Testis
ENSG00000183032.11	14	36875003	36875004	0.1691	rs1950526	-5.11	rs12883863	0.075868	5.95	-4.80908	538	13	enet	0.1	1.7e-09	-4.49	6.98e-06	0.0164008	SLC25A21	Testis
ENSG00000258708.1	14	37171887	37171888	0.1613	rs1950526	-5.11	rs7153180	0.098948	-6.66	-4.12945	471	471	susie	0.12	1.3e-10	4.9	9.79e-07	0.00648051	SLC25A21-AS1	Testis
ENSG00000151338.18	14	37197912	37197913	0.1127	rs1950526	-5.11	rs10132119	0.05071	-5.12	-4.46645	452	452	susie	0.066	1.8e-06	4.45	8.73e-06	0.018577	MIPOL1	Testis
ENSG00000260306.1	16	21795758	21795759	0.3214	rs161330	-5.86	rs4783414	0.06456	-5.88	-2.83053	137	137	susie	0.19	1.2e-16	4.09927	4.14e-05	0.0368468	RP11-645C24.5	Testis
ENSG00000183336.8	16	29454963	29454964	0.1849	rs35042042	4.43	rs4609871	0.063538	5.13	-3.59514	163	30	enet	0.07	8.8e-07	-3.9891	6.63e-05	0.0450806	BOLA2	Testis
ENSG00000226348.1	16	77220405	77220406	0.5724	rs12446878	4.63	rs11865641	0.311231	10.92	-2.75212	741	25	enet	0.52	1.6e-53	-4.30156	1.7e-05	0.024114	VN2R10P	Testis
ENSG00000196535.15	17	29180411	29180412	0.5213	rs8067041	-4.08	rs7210510	0.30737	10.36	-4.04526	335	335	susie	0.32	1.2e-28	-4.13542	3.54e-05	0.0335758	MYO18A	Testis
ENSG00000183671.12	2	206218046	206218047	0.4518	rs17288678	-5.04	rs12478642	0.268	-9.41	2.67909	428	40	enet	0.38	3.9e-35	-4.16323	3.14e-05	0.0315726	GPR1	Testis
ENSG00000186448.14	3	44584887	44584888	0.085	rs7616538	4.32	rs12635624	0.0184	4.67	-3.92801	319	319	susie	0.041	0.00015	-4.01	6.16e-05	0.0435915	ZNF197	Testis
ENSG00000173540.12	3	49723950	49723951	0.1215	rs2029591	4.29	rs1491983	0.0789	5.59	4.28777	317	1	top1	0.079	1.8e-07	4.29	1.8e-05	0.024266	GMPPB	Testis
ENSG00000213523.10	5	140558251	140558252	0.243	rs4279384	4.1	rs7712617	0.0672	6.66	-2.6931	329	21	enet	0.13	3.3e-11	-3.97509	7.04e-05	0.0456467	SRA1	Testis
ENSG00000087206.16	5	177022601	177022602	0.311	rs353489	4.16	rs2292256	0.277	9.56	4.0806	393	393	susie	0.28	5.5e-25	4.15246	3.29e-05	0.0324644	UIMC1	Testis
ENSG00000135318.11	6	85449583	85449584	0.1293	rs9362215	4.42	rs7753022	0.044292	-5.3	4.19929	431	431	susie	0.062	3.7e-06	-4.69721	2.64e-06	0.00911767	NT5E	Testis
ENSG00000280303.2	8	140636280	140636281	0.1177	rs2944776	-5.6	rs7016497	0.111308	6.54	-3.51	369	4	lasso	0.14	5.5e-12	-4.00114	6.3e-05	0.0440913	ERICD	Testis
ENSG00000107742.12	10	72089031	72089032	0.1437	rs4148946	-5.64	rs1245548	0.052779	6.68	4.36093	463	18	enet	0.07	7.4e-11	4.07775	4.55e-05	0.0387588	SPOCK2	Thyroid
ENSG00000258708.1	14	37171887	37171888	0.1121	rs1950526	-5.11	rs8012018	0.0487	-5.97	-4.2602	460	460	susie	0.049	4.8e-08	4.24851	2.15e-05	0.0258763	SLC25A21-AS1	Thyroid
ENSG00000151338.18	14	37197912	37197913	0.0759	rs1950526	-5.11	rs7151191	0.00462	4.84	-4.83532	441	5	lasso	0.017	0.001	-4.6548	3.24e-06	0.0100928	MIPOL1	Thyroid
ENSG00000169246.16	16	21440718	21440719	0.1256	rs161330	-5.15	rs12102923	0.026044	-4.26	-1.29004	203	15	enet	0.04	8.6e-07	3.97846	6.94e-05	0.0456467	NPIPB3	Thyroid
ENSG00000280789.1	16	29815951	29815952	0.0632	rs35042042	4.07	rs1129700	-0.000271	3.63	-2.81098	152	152	susie	0.025	8.4e-05	-4.26516	2e-05	0.0256199	PAGR1	Thyroid
ENSG00000124302.12	19	33621954	33621955	0.126	rs8112967	-4.58	rs12610008	0.054	5.66	3.67802	474	38	enet	0.055	7.3e-09	4.25111	2.13e-05	0.0257331	CHST8	Thyroid
ENSG00000169599.12	2	69437627	69437628	0.1382	rs13429805	4.98	rs13751	0.106	8.3	4.92457	377	377	susie	0.11	1e-16	4.82461	1.4e-06	0.00678802	NFU1	Thyroid
ENSG00000144214.9	2	99304741	99304742	0.2343	rs12479064	4.36	rs6715321	0.122	9.47	3.581	312	25	enet	0.24	6.2e-36	4.19045	2.78e-05	0.0295421	LYG1	Thyroid
ENSG00000186448.14	3	44584887	44584888	0.2509	rs7616538	4.32	rs12635624	0.286	13.01	-3.92801	319	319	susie	0.31	4.8e-49	-4.02793	5.63e-05	0.0417958	ZNF197	Thyroid
ENSG00000163807.5	3	44761661	44761662	0.1685	rs3804580	4.29	rs937834	0.166	9.86	3.82072	386	28	enet	0.17	2.2e-25	4.2181	2.46e-05	0.0280155	KIAA1143	Thyroid
ENSG00000164068.15	3	49689501	49689502	0.1258	rs2029591	4.29	rs11716575	0.121	8.48	3.16088	316	316	susie	0.13	2.1e-19	3.93395	8.36e-05	0.0497431	RNF123	Thyroid
ENSG00000178222.12	4	1113561	1113562	0.1479	rs2242278	4.8	rs2127908	0.0406	-5	-4.29049	381	1	top1	0.041	6.7e-07	4.29049	1.78e-05	0.0241697	RNF212	Thyroid
ENSG00000273179.1	4	1167777	1167778	0.0698	rs2242278	4.8	rs11247975	0.0494	5.5	-4.32137	379	1	top1	0.049	4.5e-08	-4.32137	1.55e-05	0.0232709	RP11-20I20.4	Thyroid
ENSG00000283602.1	5	140594569	140594570	0.1715	rs4279384	4.1	rs4279384	0.154	10.11	4.10147	328	13	enet	0.16	6.9e-24	3.96627	7.3e-05	0.046297	AC011380.8	Thyroid
ENSG00000078399.17	7	27175179	27175180	0.0646	rs10081212	-4.65	rs10259620	0.00184	-4.42	-2.25045	395	8	enet	0.021	0.00028	3.98479	6.75e-05	0.0454391	HOXA9	Thyroid
ENSG00000136918.7	9	124853416	124853417	0.1594	rs16927537	5.04	rs876663	0.16688	-9.88	-4.17715	284	1	top1	0.17	1e-24	4.17715	2.95e-05	0.0304326	WDR38	Thyroid
ENSG00000122863.5	10	71964364	71964365	0.2068	rs4148946	-5.64	rs1678627	0.075637	4.33	4.16484	559	1	top1	0.076	0.00094	4.1648	3.12e-05	0.0314711	CHST3	Uterus
ENSG00000213523.10	5	140558251	140558252	0.1335	rs4279384	4.1	rs1862176	0.0425	-4	3.9714	328	1	top1	0.042	0.011	-3.9714	7.14e-05	0.0456467	SRA1	Uterus
ENSG00000283602.1	5	140594569	140594570	0.363	rs4279384	4.1	rs4279384	0.248	5.91	4.1015	328	328	susie	0.25	8.5e-10	4.0889	4.33e-05	0.0377638	AC011380.8	Uterus
ENSG00000260306.1	16	21795758	21795759	0.5121	rs161330	-5.86	rs4783412	0.019946	-3.58	-2.569	137	10	lasso	0.037	0.013	4.5104	6.47e-06	0.0154568	RP11-645C24.5	Vagina
ENSG00000260078.3	16	53373082	53373083	0.1787	rs12149531	3.24	rs7192866	0.037097	3.57	2.8192	385	385	susie	0.083	0.00031	4.0317	5.54e-05	0.0416889	RP11-44F14.1	Vagina
ENSG00000273179.1	4	1167777	1167778	0.218	rs2242278	4.8	rs11247975	0.005536	3.41	-4.32137	384	24	enet	0.055	0.0031	-4	6.27e-05	0.0440755	RP11-20I20.4	Vagina
ENSG00000213523.10	5	140558251	140558252	0.1719	rs4279384	4.1	rs6860077	0.0949	-4.62	3.9731	329	329	susie	0.12	1.5e-05	-3.9774	6.97e-05	0.0456467	SRA1	Vagina
ENSG00000234155.1	6	85390185	85390186	0.1826	rs9362215	4.42	rs4400191	0.063573	4.41	4.2086	444	1	top1	0.064	0.0015	4.20863	2.57e-05	0.0288546	RP11-30P6.6	Vagina
ENSG00000065665.20	10	12129636	12129637	0.1621	rs11818932	3.88	rs12267387	0.0791	-8.11	2.80915	521	521	susie	0.11	1e-18	-3.97144	7.14e-05	0.0456467	SEC61A2	Whole_Blood
ENSG00000171067.10	11	68272000	68272001	0.1472	rs2137328	-3.67	rs7342161	0.0302	-5.62	-3.39003	297	23	enet	0.046	1e-08	4.26	2.08e-05	0.0256634	C11orf24	Whole_Blood
ENSG00000183032.11	14	36875003	36875004	0.0595	rs1950526	-5.11	rs8012018	0.0333	5.69	-4.2825	531	4	lasso	0.043	3.4e-08	-4.73437	2.2e-06	0.00867964	SLC25A21	Whole_Blood
ENSG00000260306.1	16	21795758	21795759	0.2586	rs161330	-5.62	rs4783412	0.0683	-8.12	-2.56903	128	128	susie	0.18	2.7e-30	4.43287	9.3e-06	0.0189111	RP11-645C24.5	Whole_Blood
ENSG00000183336.8	16	29454963	29454964	0.0616	rs35042042	4.37	rs11646118	0.0191	-4.89	3.27088	158	4	lasso	0.022	6.5e-05	-4.16087	3.17e-05	0.0315745	BOLA2	Whole_Blood
ENSG00000102886.14	16	30113855	30113856	0.1819	rs35042042	4.47	rs6565174	0.0421	-7.24	2.69489	223	26	enet	0.12	6.8e-20	-4.15105	3.31e-05	0.032551	GDPD3	Whole_Blood
ENSG00000103051.18	16	70523564	70523565	0.4089	rs7192865	4.19	rs7192865	0.161	-10.42	4.19081	153	1	top1	0.16	1.9e-27	-4.19081	2.78e-05	0.0295421	COG4	Whole_Blood
ENSG00000167914.11	17	39953262	39953263	0.5877	rs9972899	4.48	rs11655584	0.0425	7.25	2.14572	297	39	enet	0.29	3e-51	3.9902	6.6e-05	0.0450806	GSDMA	Whole_Blood
ENSG00000198380.12	2	69387253	69387254	0.0849	rs6724567	4.97	rs7592828	0.102	8.91	4.81	392	22	enet	0.12	7.1e-21	4.63302	3.6e-06	0.0106009	GFPT1	Whole_Blood
ENSG00000178222.12	4	1113561	1113562	0.1397	rs2242278	4.8	rs17164229	-0.00142	-4.04	-3.8217	385	31	enet	0.0069	0.018	4.276	1.9e-05	0.0246408	RNF212	Whole_Blood
ENSG00000273179.1	4	1167777	1167778	0.0883	rs2242278	4.8	rs4974629	0.0419	6.99	-4.4048	383	12	enet	0.072	1.1e-12	-4.4116	1.03e-05	0.0191385	RP11-20I20.4	Whole_Blood
ENSG00000171530.13	5	77868779	77868780	0.1177	rs13175351	4.17	rs11954532	0.051384	-6.22	4.15611	457	457	susie	0.073	7e-13	-4.8172	1.46e-06	0.00692382	TBCA	Whole_Blood
ENSG00000283602.1	5	140594569	140594570	0.2215	rs4279384	4.1	rs1432959	0.178902	11.13	3.98097	328	15	enet	0.2	2.5e-35	3.9866	6.7e-05	0.0451983	AC011380.8	Whole_Blood
ENSG00000135318.11	6	85449583	85449584	0.319	rs9362215	4.42	rs9450278	0.212	-12.31	4.23044	430	430	susie	0.23	1e-39	-4.58083	4.63e-06	0.0123624	NT5E	Whole_Blood
ENSG00000004864.13	7	96322146	96322147	0.082	rs7811725	4.92	rs12216562	0.07177	8.72	4.24365	420	13	enet	0.095	1.7e-16	4.38056	1.18e-05	0.0209458	SLC25A13	Whole_Blood
The table lists gene identifiers, genomic positions, top SNP drivers, prediction models, TWAS Z-scores, p-values, FDR values, and the corresponding tissue of association. Genes with FDR < 0.05 are considered significant.
